# Supplementary material for: Poly[N-(2-chloroprop-2-en-1-yl)aniline]s: synthesis, polymer analogous reaction, and physicochemical properties
Source: Royal Society of Chemistry journal article supplement (doi:10.1039/d1py00940k), 2021-01-01
Supplement: d1py00940k1.pdf [file d1py00940k1.pdf]

## Supporting Information

### Poly[N-(2-chloroprop-2-en-1-yl)aniline]s: Sythesis, polymer analogous reaction, and Physicochemical Properties

Akhat G. Mustafin,\* Lyaysan R. Latypova,\* Anastasiia N. Andriianova and Gulsum S. Usmanova

Laboratory of organic fuctional materials, Ufa Institute of Chemistry of the Russian Academy of Sciences, Republic of Bashkortostan, pr. Oktyabrya 71, Ufa 450054, Russia

\* Corresponding Author

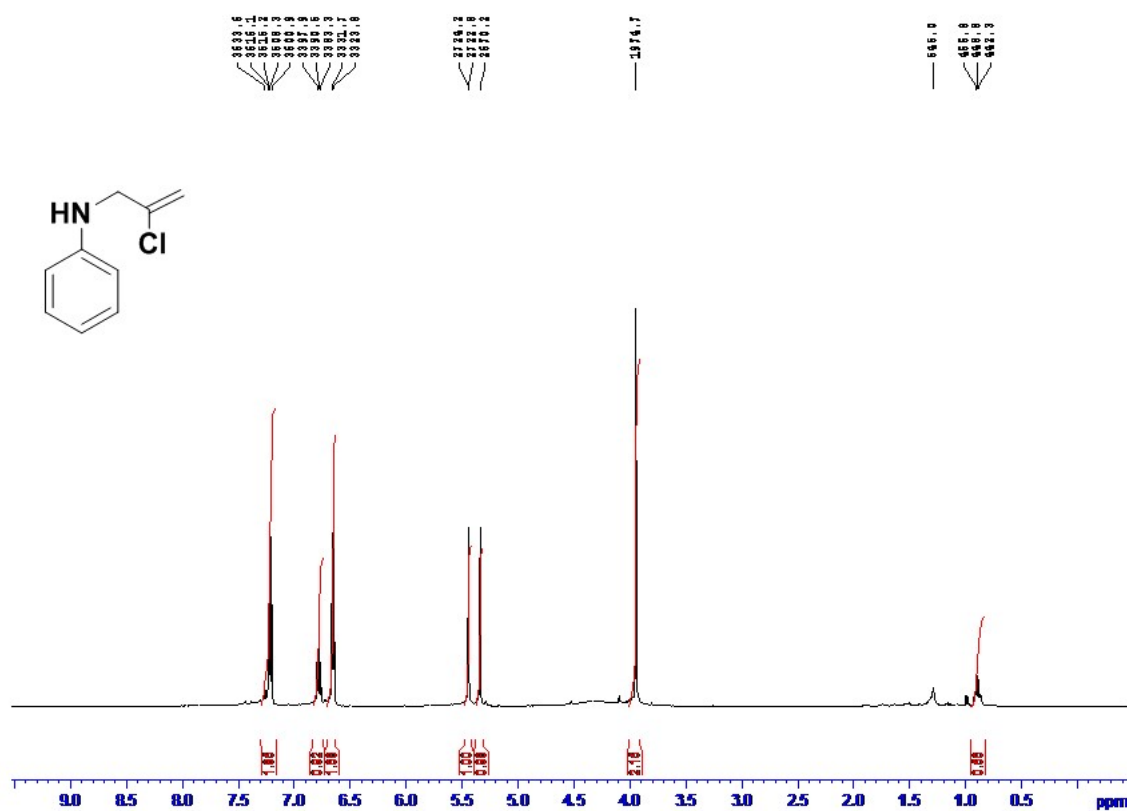

Figure S1. <sup>1</sup>H NMR spectra of N-(2-chloroprop-2-en-1-yl)aniline

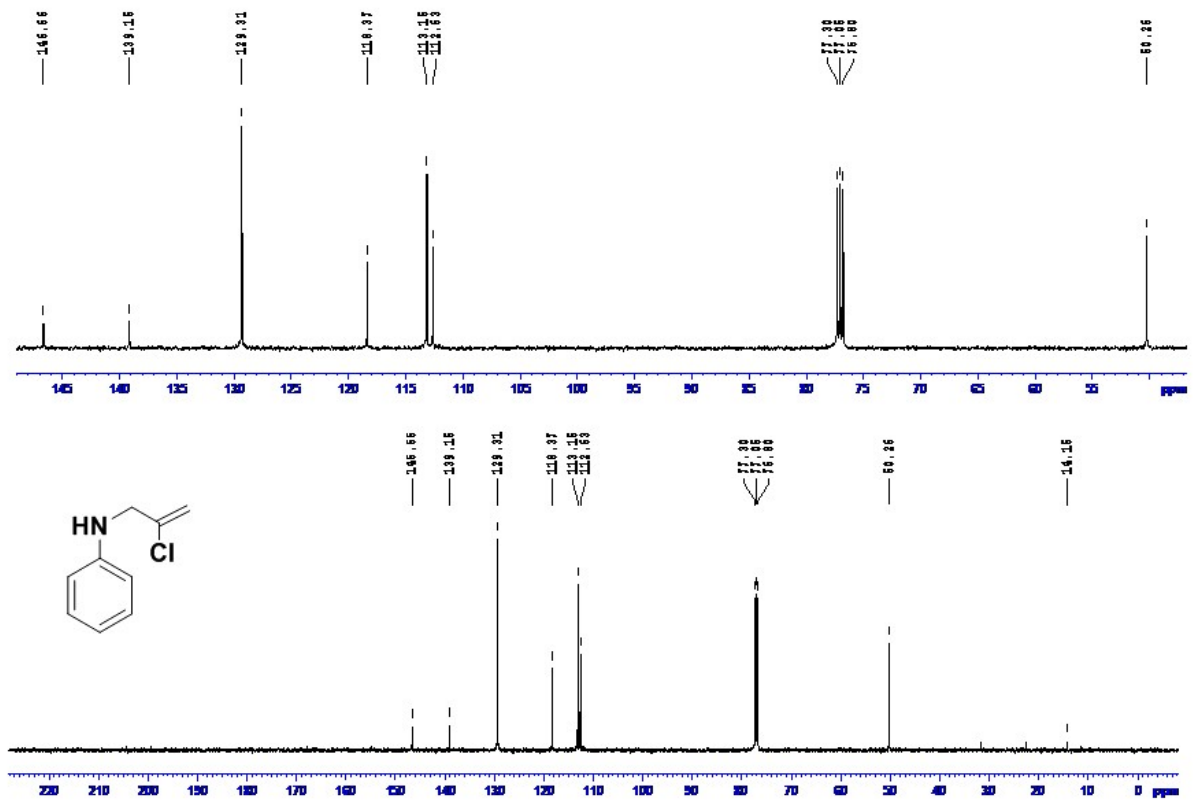

Figure S2.  $^{13}\text{C}$  NMR spectra of N-(2-chloroprop-2-en-1-yl)aniline

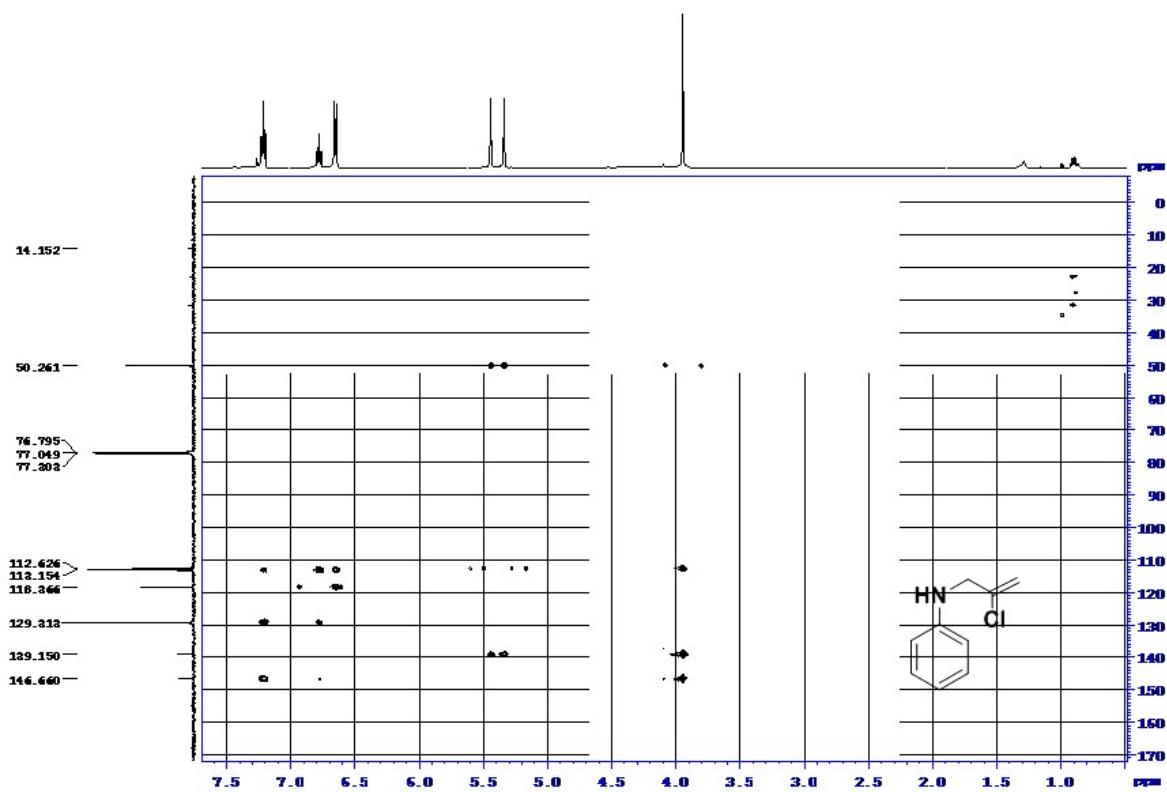

Figure S3.  $^1\text{H}$ - $^{15}\text{N}$  HMBC spectra of N-(2-chloroprop-2-en-1-yl)aniline

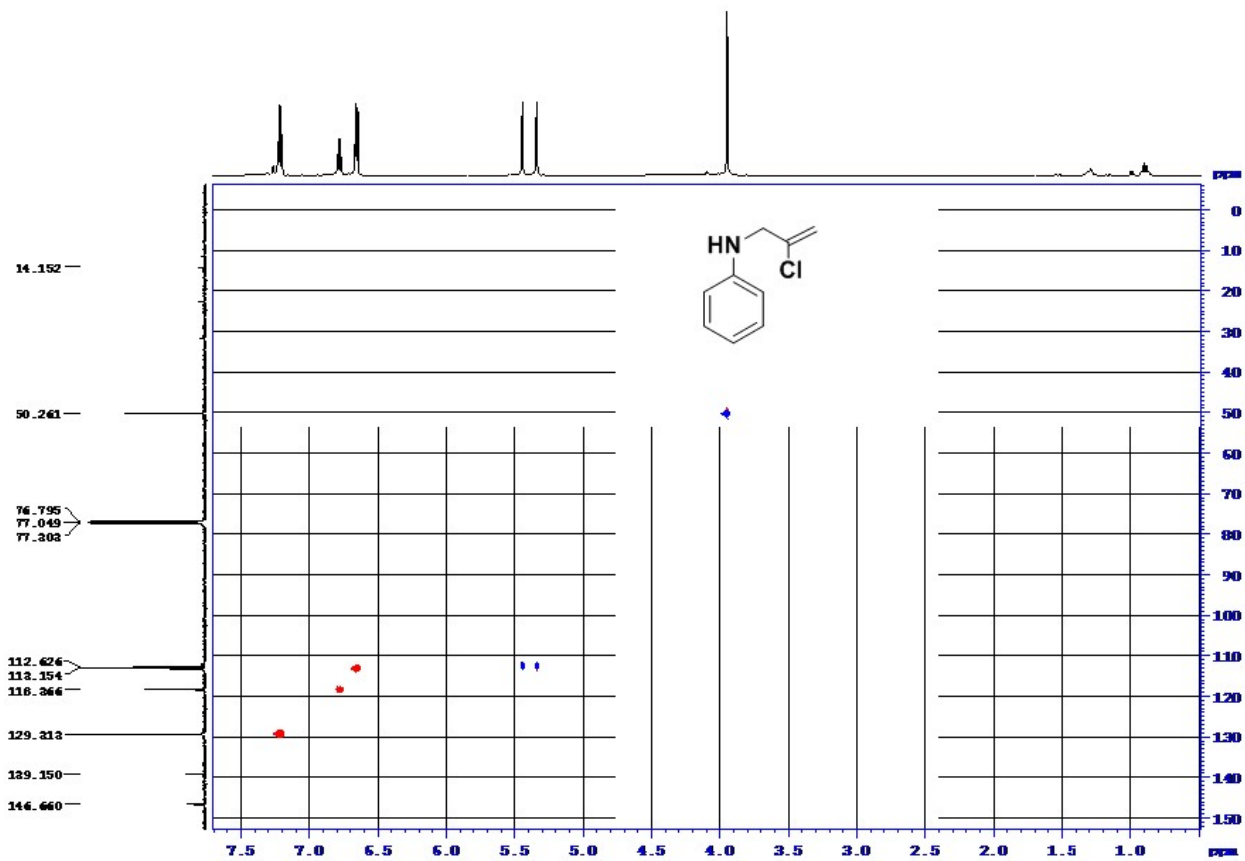

Figure S4.  $^1\text{H}$ - $^{13}\text{C}$  HSQC spectra of N-(2-chloroprop-2-en-1-yl)aniline

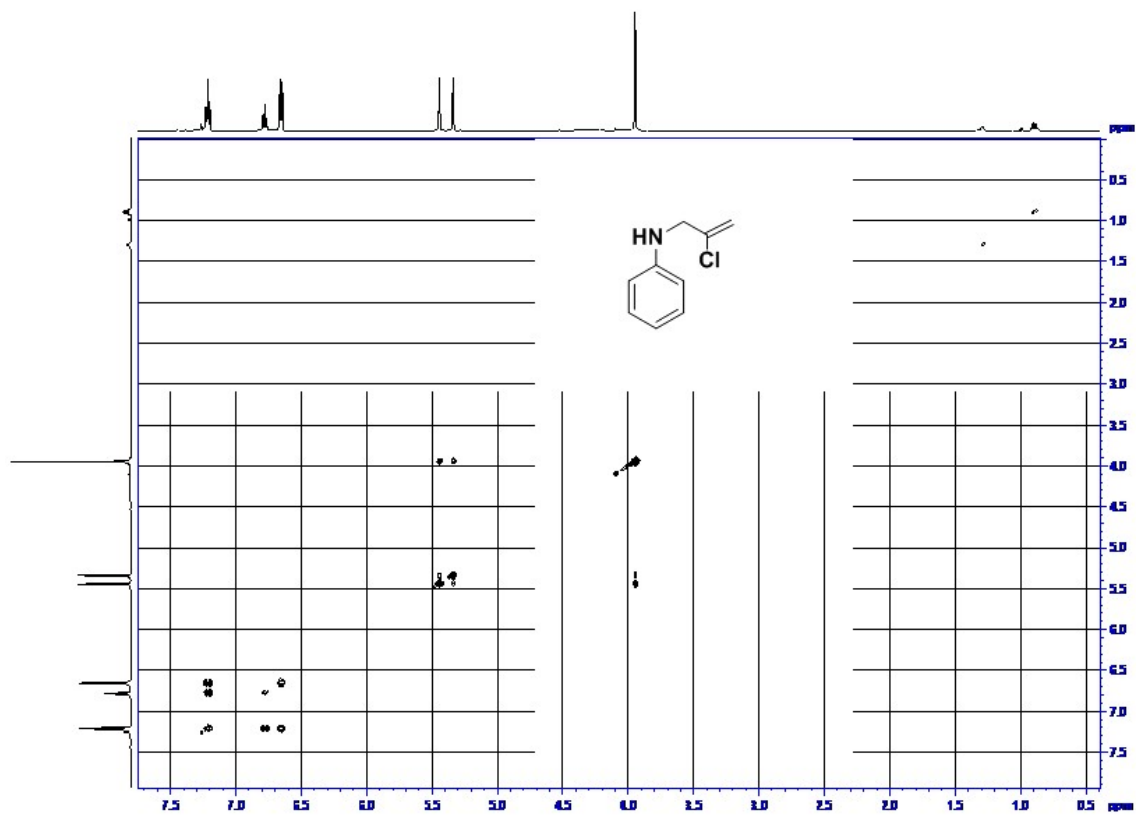

Figure S5.  $^1\text{H}$ - $^{13}\text{C}$  COSY spectra of N-(2-chloroprop-2-en-1-yl)aniline

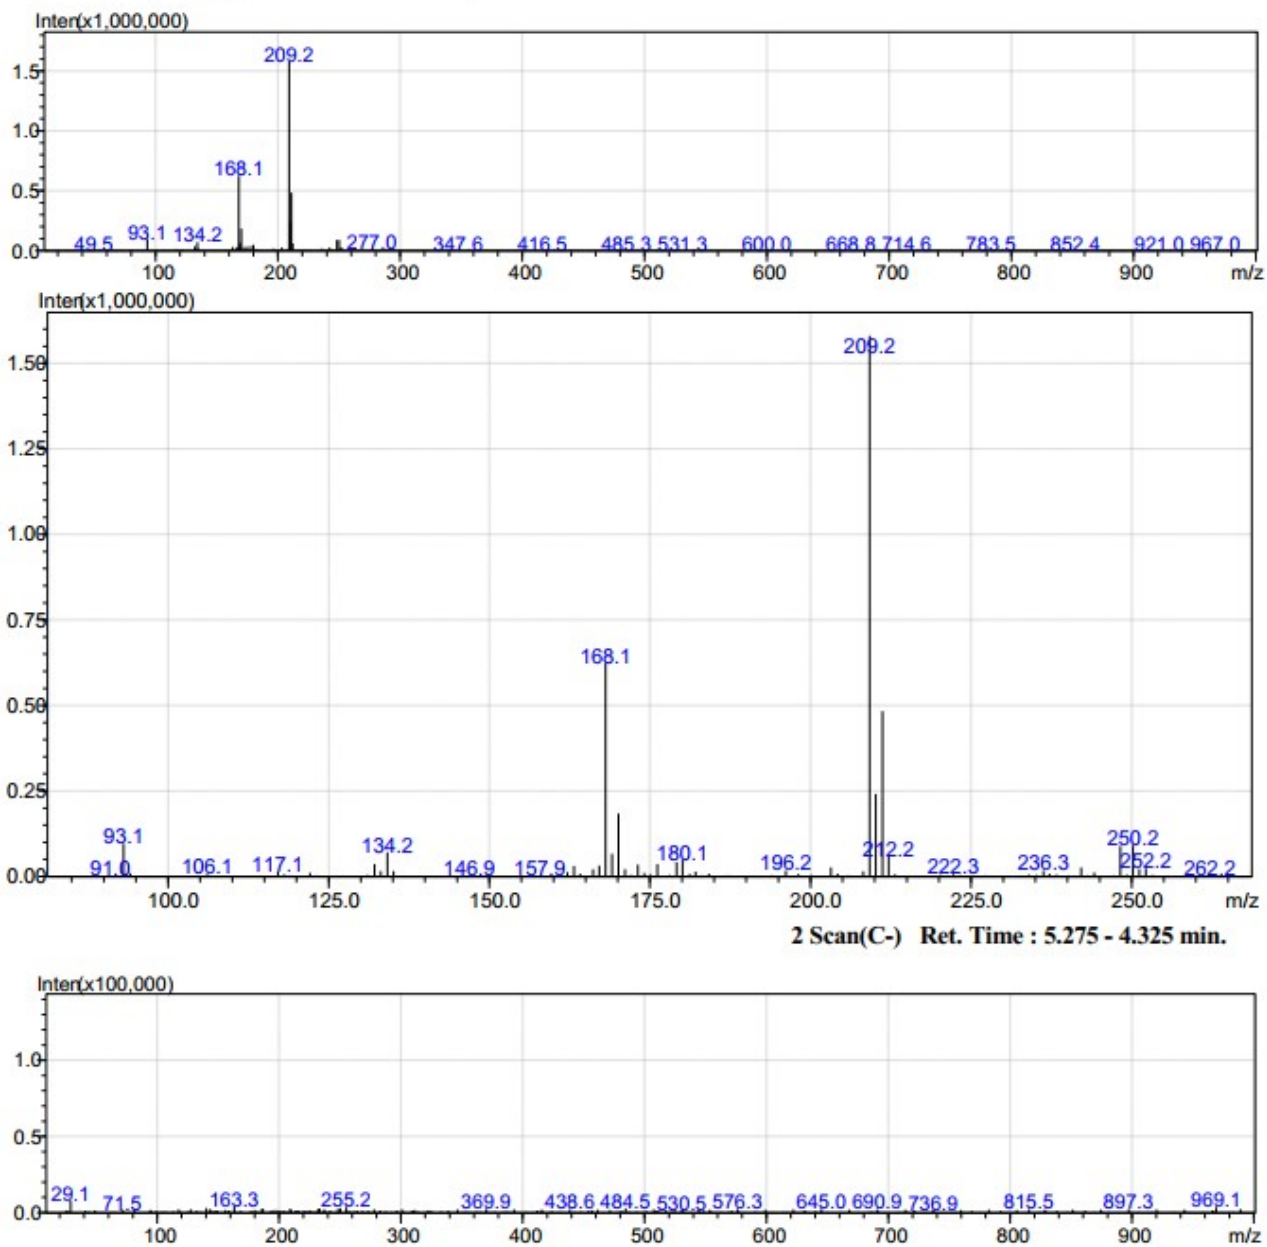

Figure S6. Mass spectrum of N-(2-chloroprop-2-en-1-yl)aniline

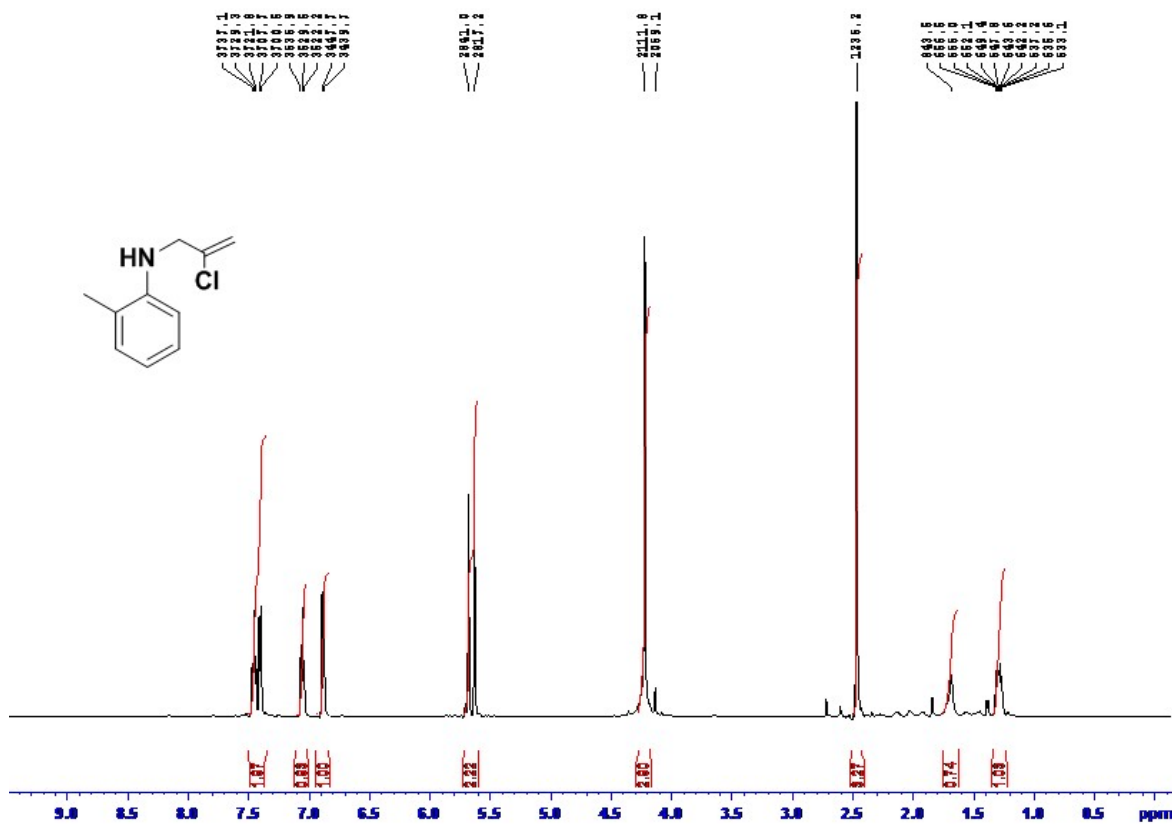

Figure S7.  $^1\text{H}$  NMR spectra of N-(2-chloroprop-2-en-1-yl)-2-methylaniline

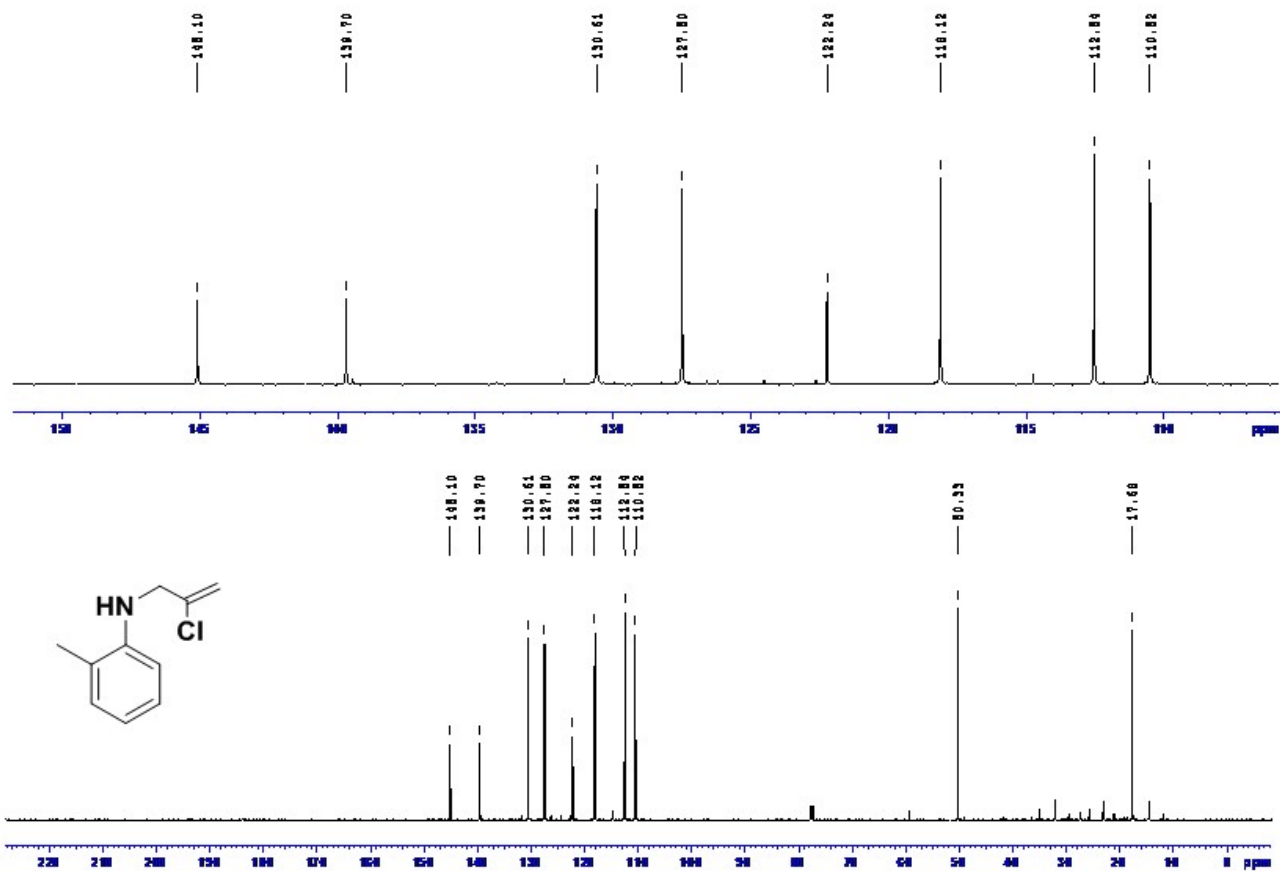

Figure S8.  $^{13}\text{C}$  NMR spectra of N-(2-chloroprop-2-en-1-yl)-2-methylaniline

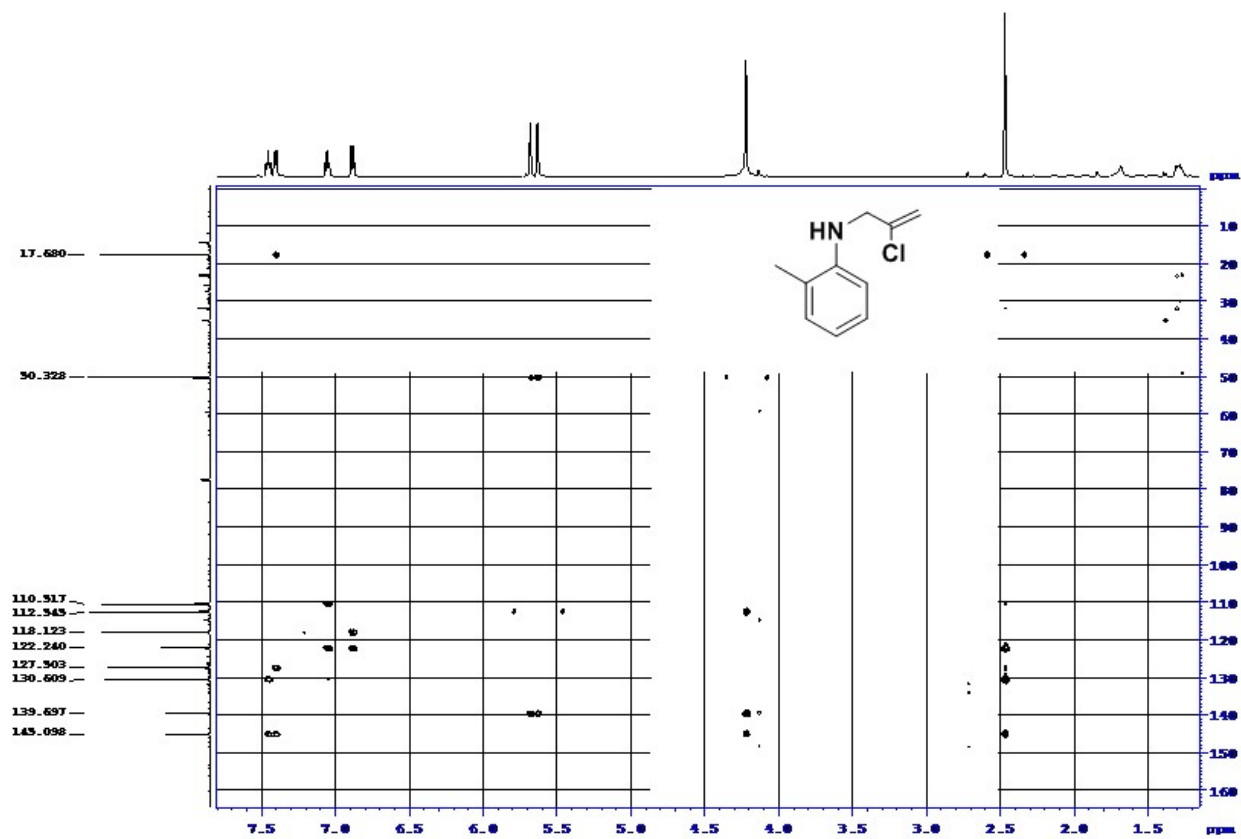

Figure S9.  $^1\text{H}$ - $^{15}\text{N}$  HMBC spectra of N-(2-chloroprop-2-en-1-yl)-2-methylaniline

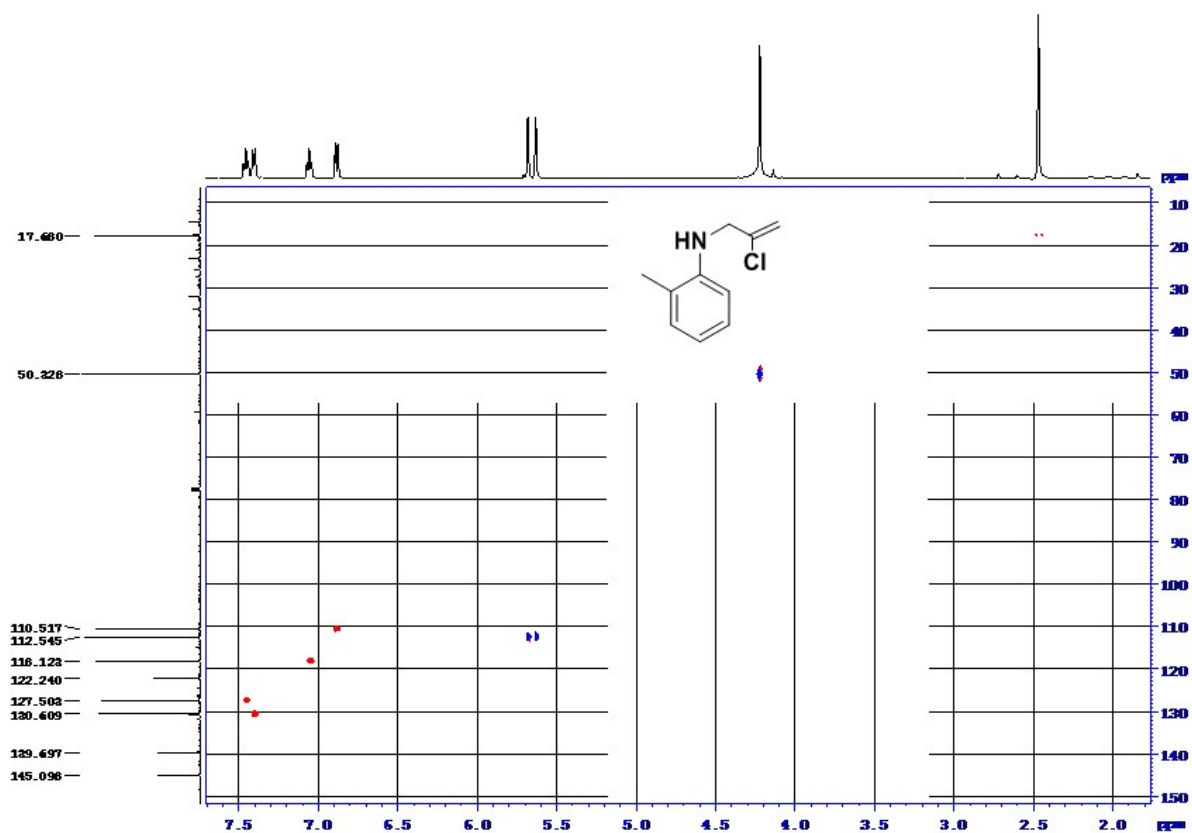

Figure S10.  $^1\text{H}$ - $^{13}\text{C}$  HSQC spectra of N-(2-chloroprop-2-en-1-yl)-2-methylaniline

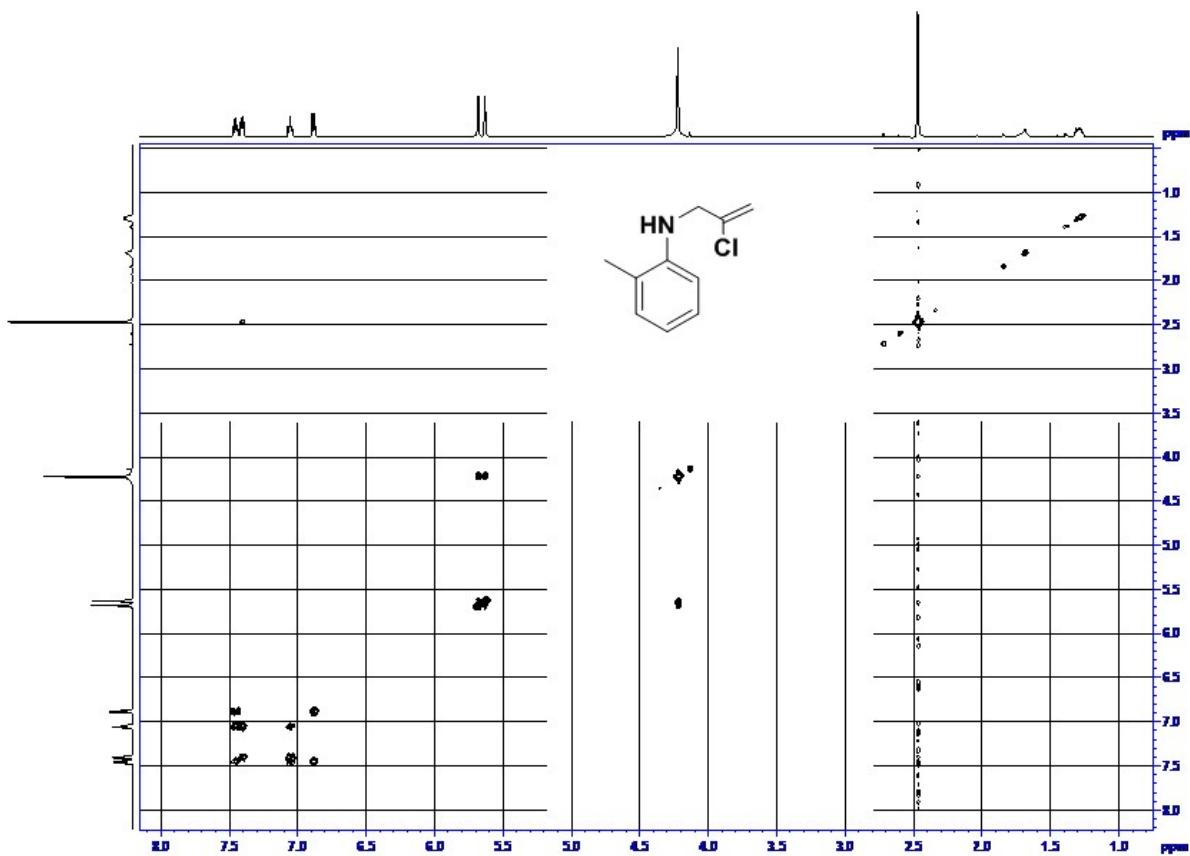

Figure S11.  $^1\text{H}$ - $^{13}\text{C}$  COSY spectra of N-(2-chloroprop-2-en-1-yl)-2-methylaniline

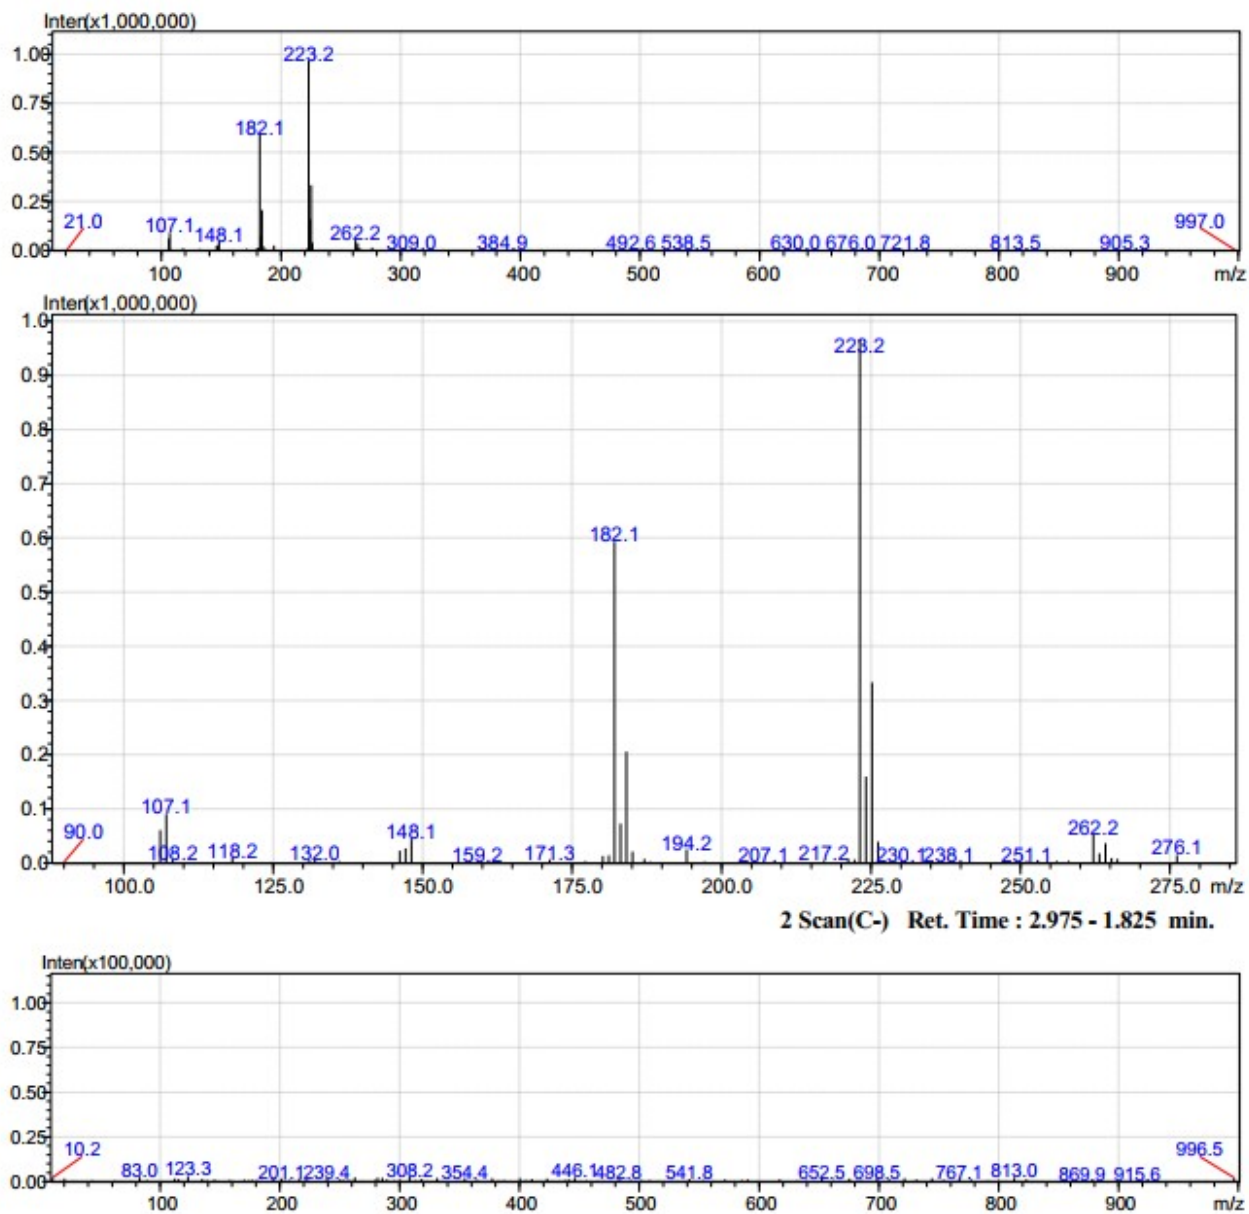

Figure S12. Mass spectrum of N-(2-chloroprop-2-en-1-yl)-2-methylaniline



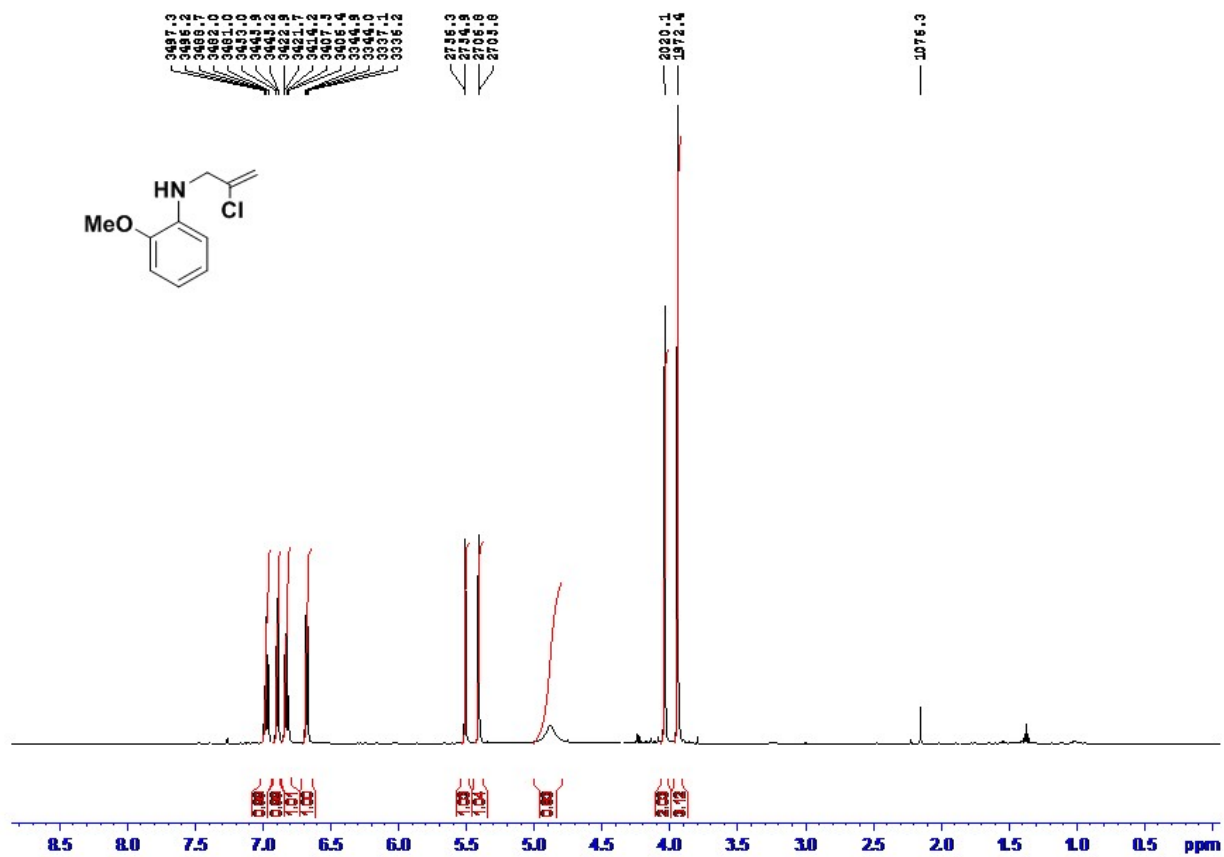

Figure S13. <sup>1</sup>H NMR spectra of N-(2-chloroprop-2-en-1-yl)-2-methoxyaniline

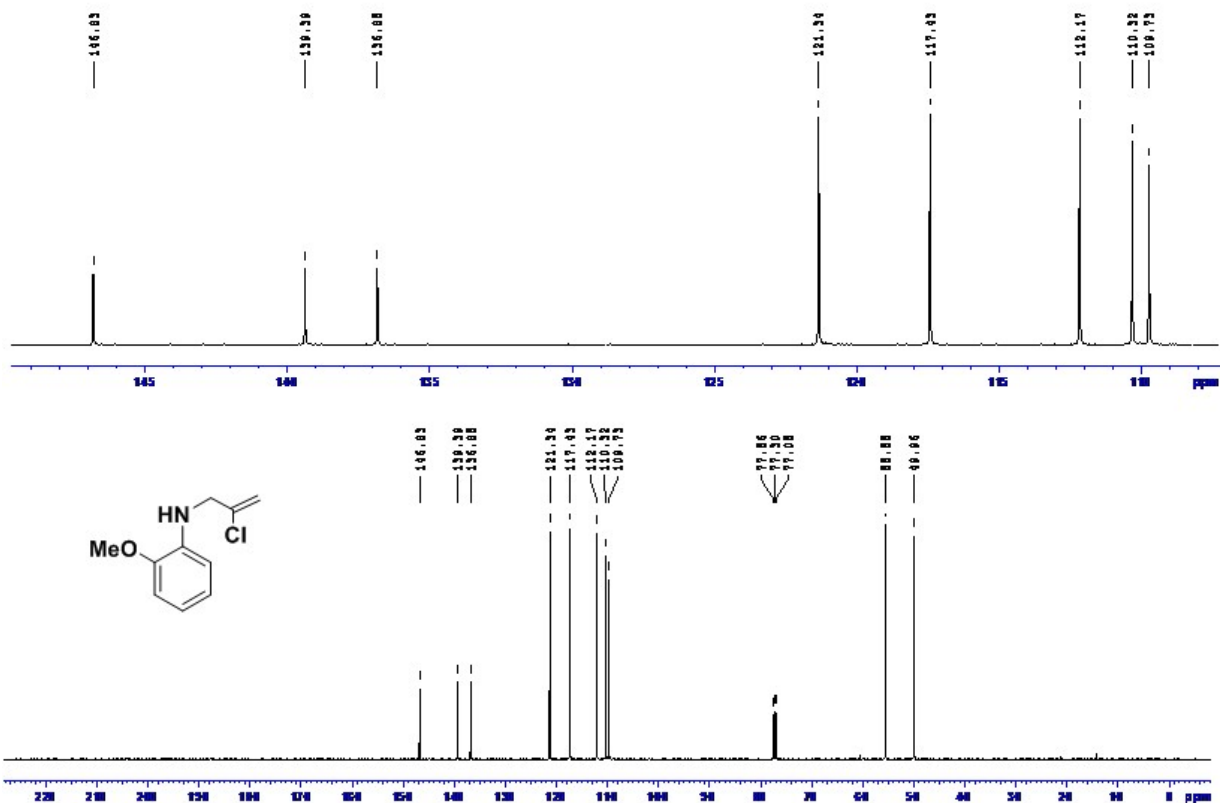

Figure S14. <sup>13</sup>C NMR spectra of N-(2-chloroprop-2-en-1-yl)-2-methoxyaniline

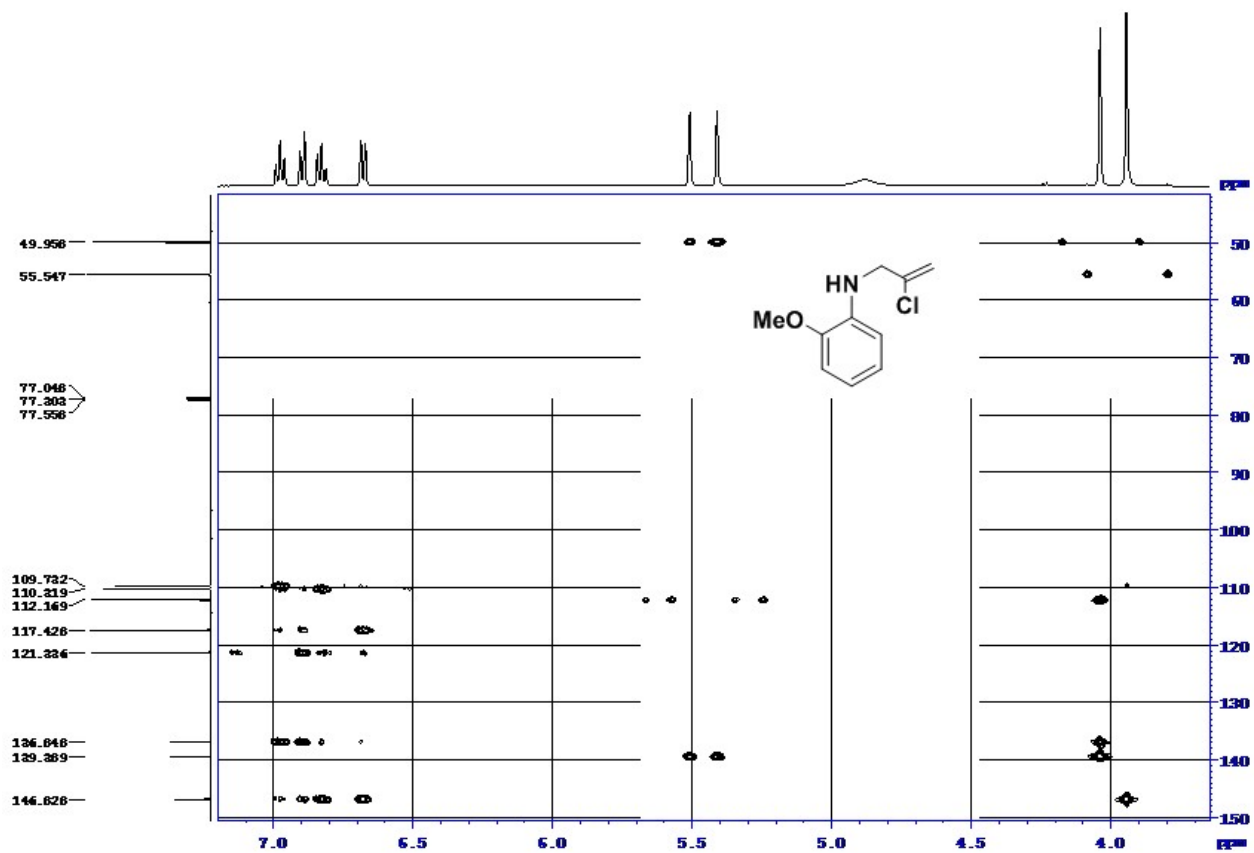

Figure S15.  $^1\text{H}$ - $^{15}\text{N}$  HMBC spectra of N-(2-chloroprop-2-en-1-yl)-2-methoxyaniline

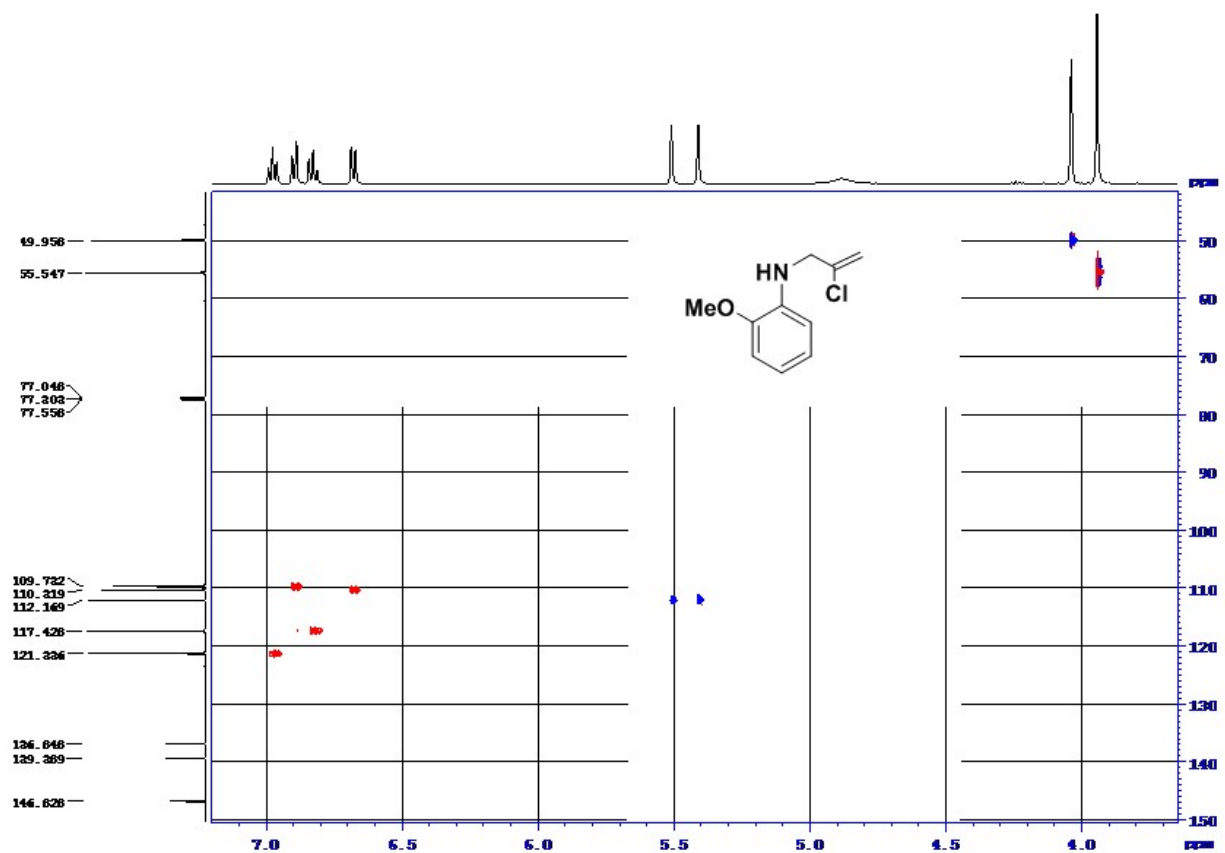

Figure S16.  $^1\text{H}$ - $^{13}\text{C}$  HSQC spectra of N-(2-chloroprop-2-en-1-yl)-2-methoxyaniline

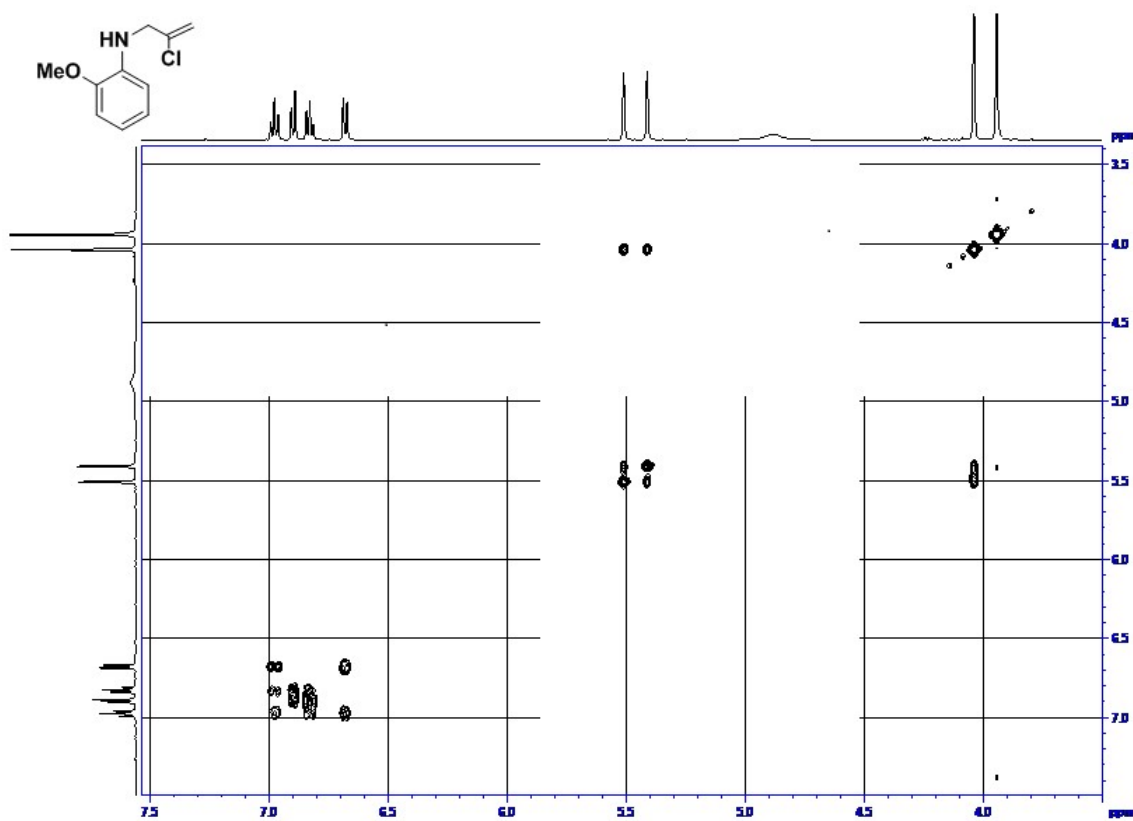

Figure S17.  $^1\text{H}$ - $^{13}\text{C}$  COSY spectra of N-(2-chloroprop-2-en-1-yl)-2-methoxyaniline

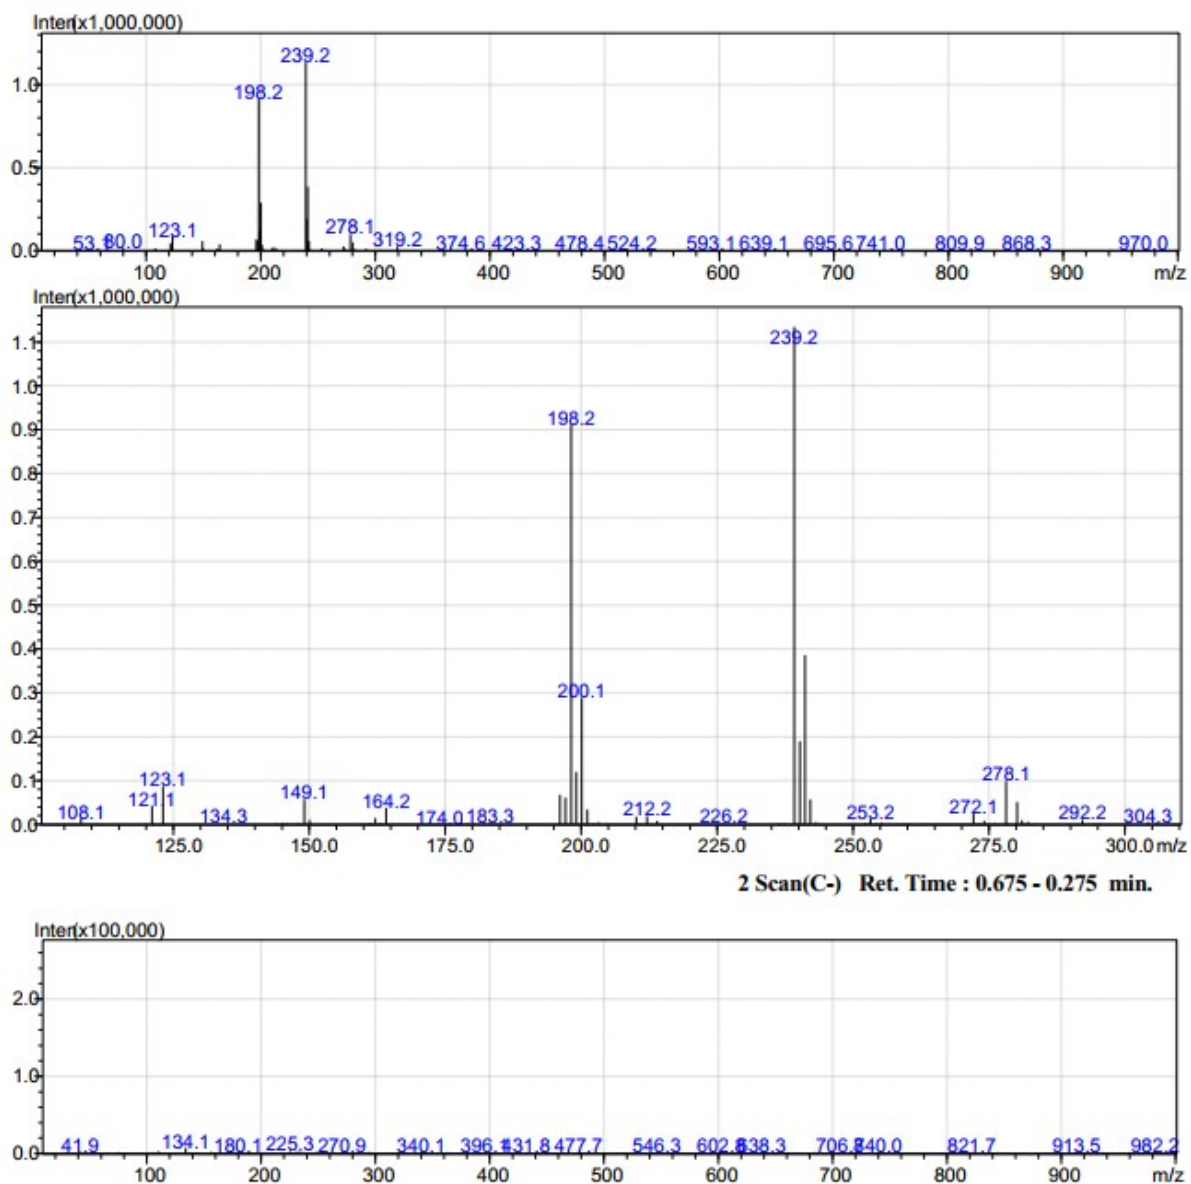

Figure S18. Mass spectrum of N-(2-chloroprop-2-en-1-yl)-2-methoxyaniline

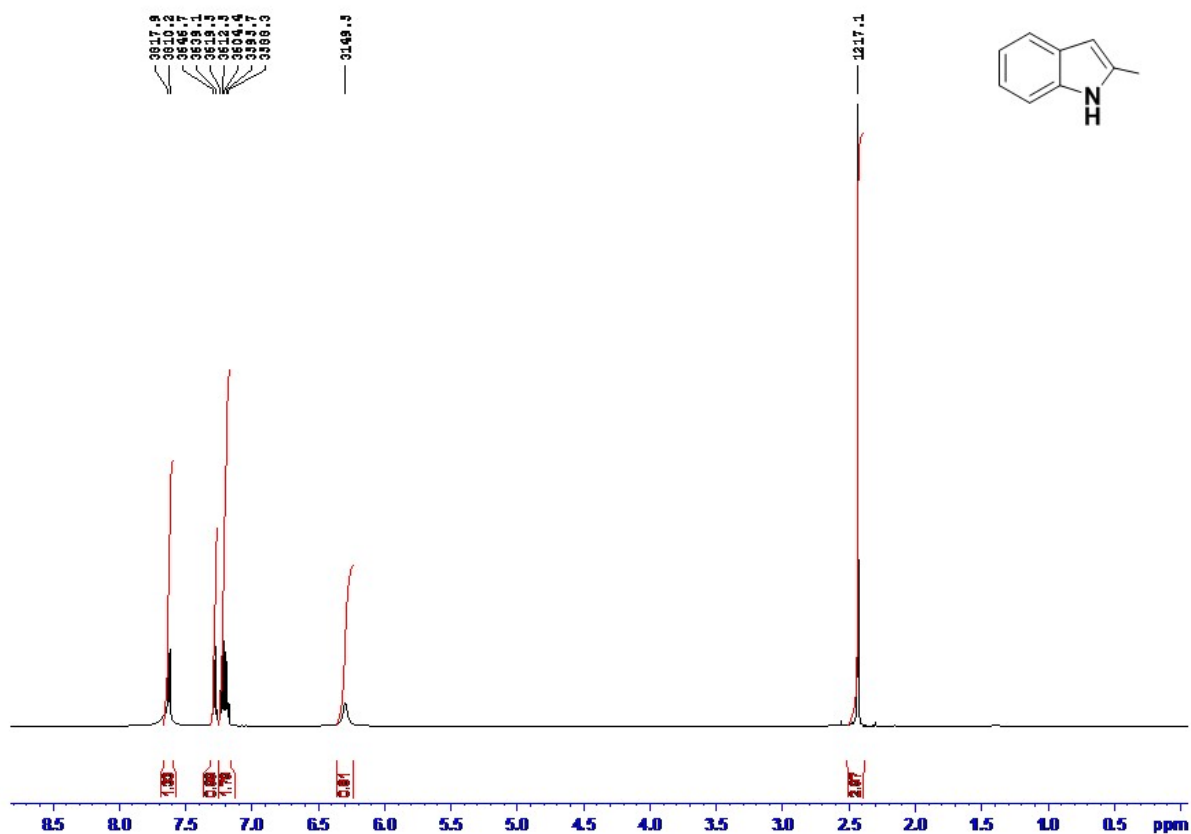

Figure S19.  $^1\text{H}$  NMR spectra of 2-methyl-1*H*-indole

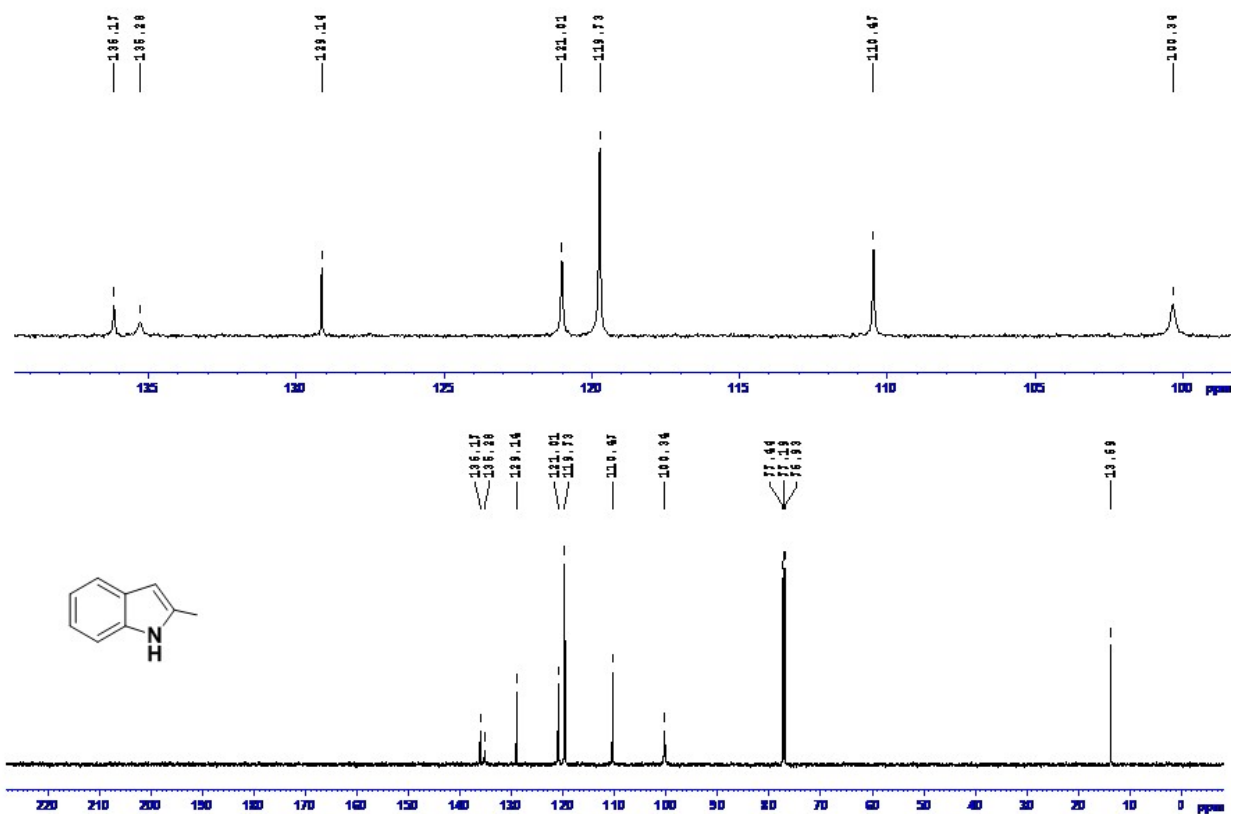

Figure S20.  $^{13}\text{C}$  NMR spectra of 2-methyl-1*H*-indole

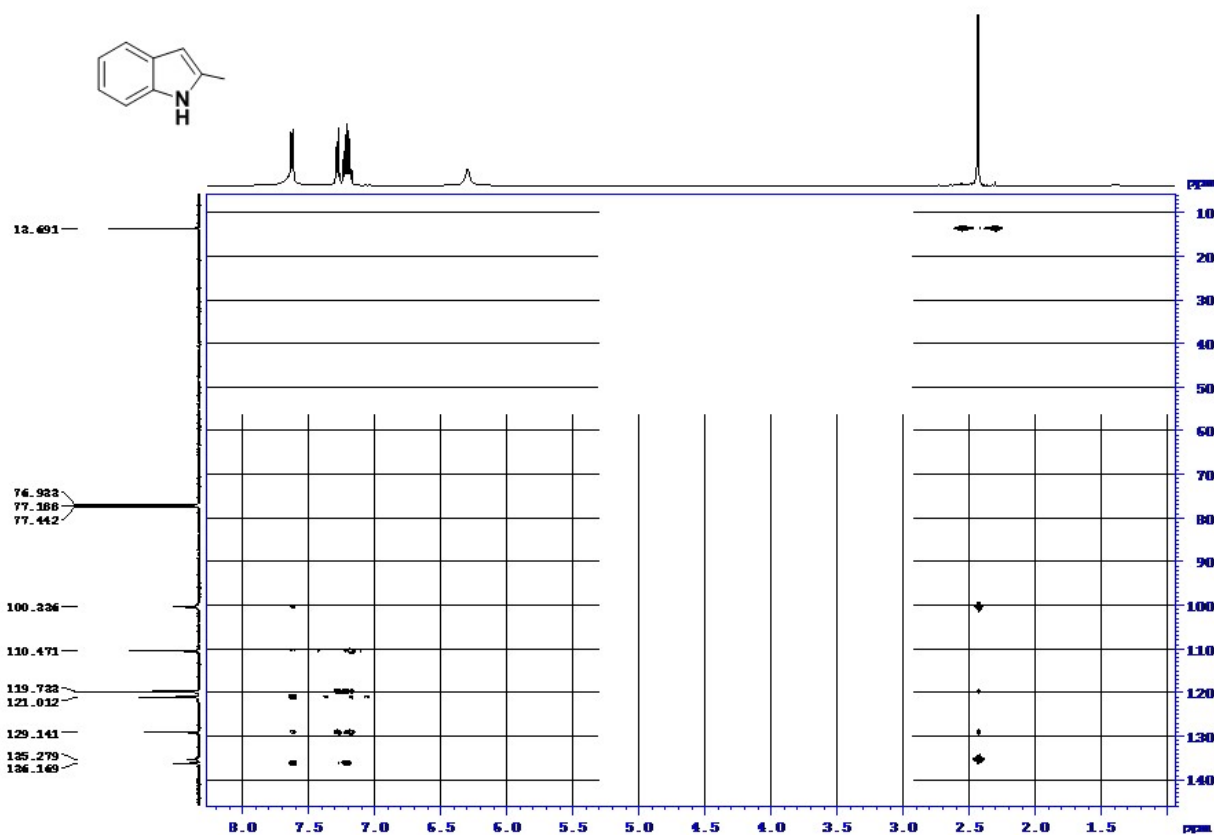

Figure S21.  $^1\text{H}$ - $^{15}\text{N}$  HMBC spectra of 2-methyl-1H-indole

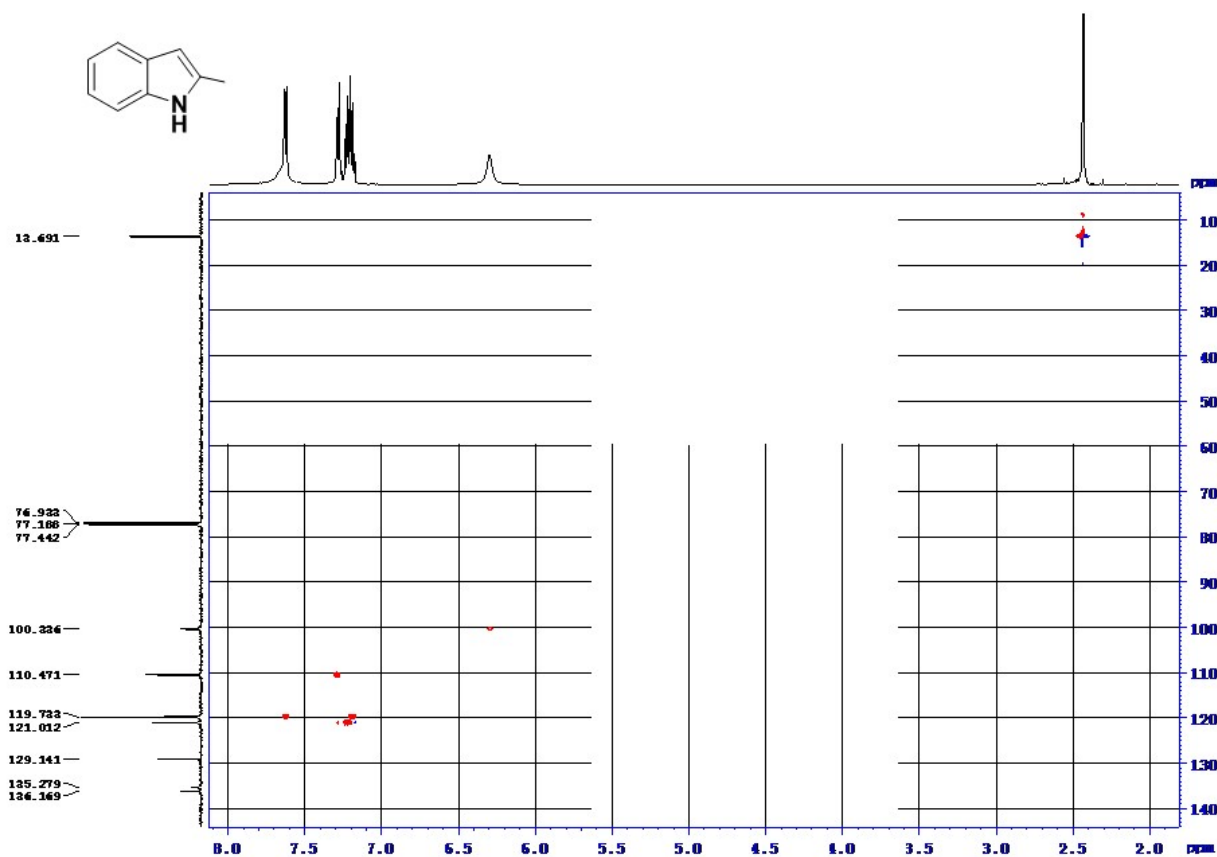

Figure S22.  $^1\text{H}$ - $^{13}\text{C}$  HSQC spectra of 2-methyl-1H-indole

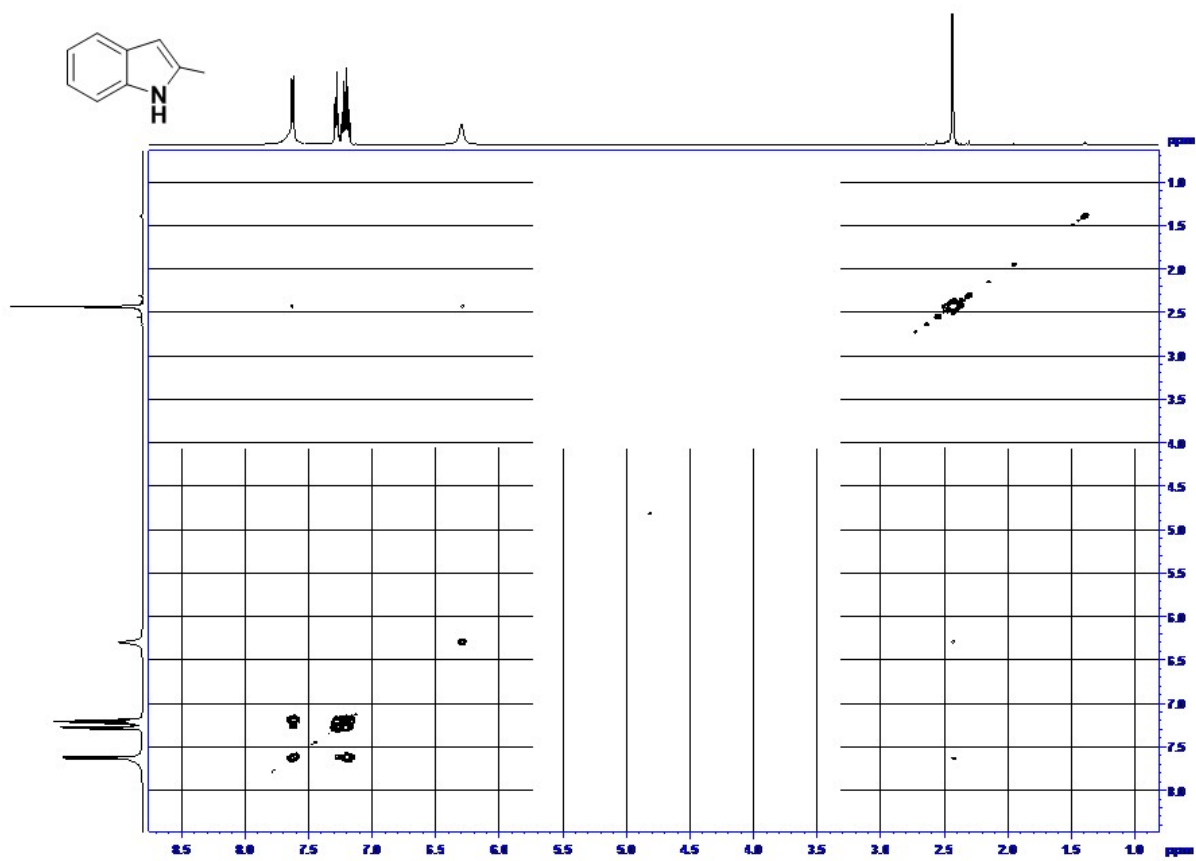

Figure S23.  $^1\text{H}$ - $^{13}\text{C}$  COSY spectra of 2-methyl-1*H*-indole

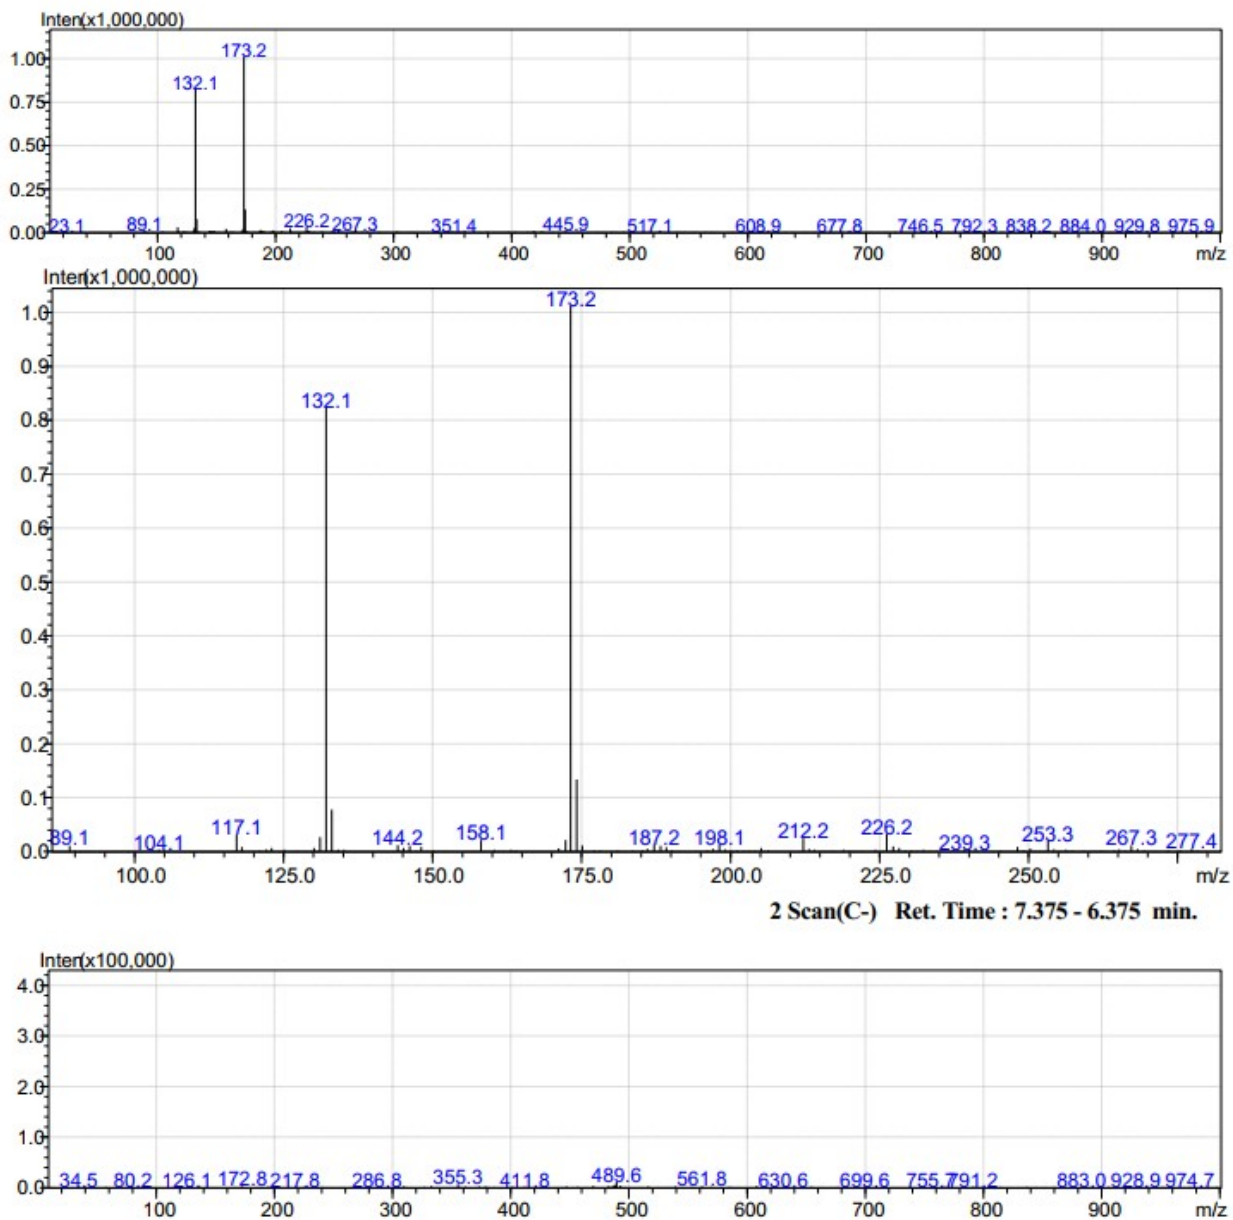

**Figure S24.** Mass spectrum of 2-methyl-1*H*-indole



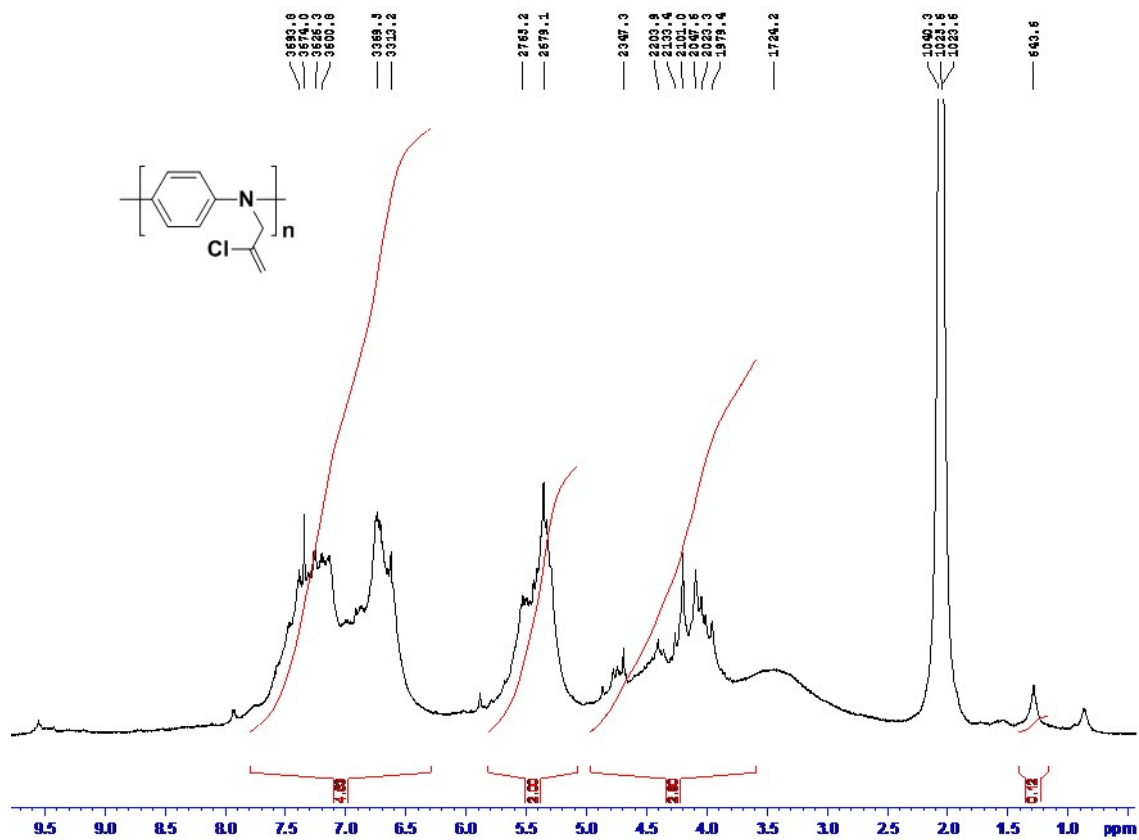

Figure S25.  $^1\text{H}$  NMR spectra of poly[N-(2-chloroprop-2-en-1-yl)aniline]

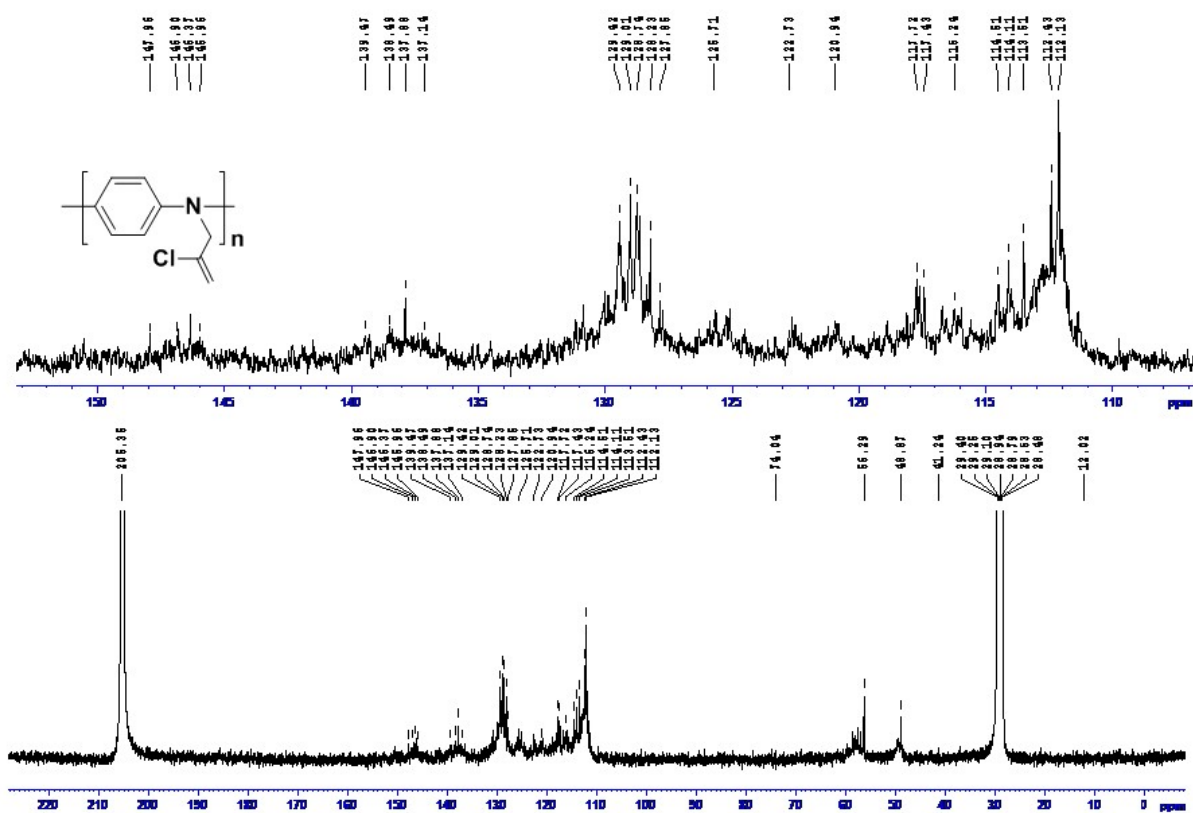

Figure S26.  $^{13}\text{C}$  NMR spectra of poly[N-(2-chloroprop-2-en-1-yl)aniline]

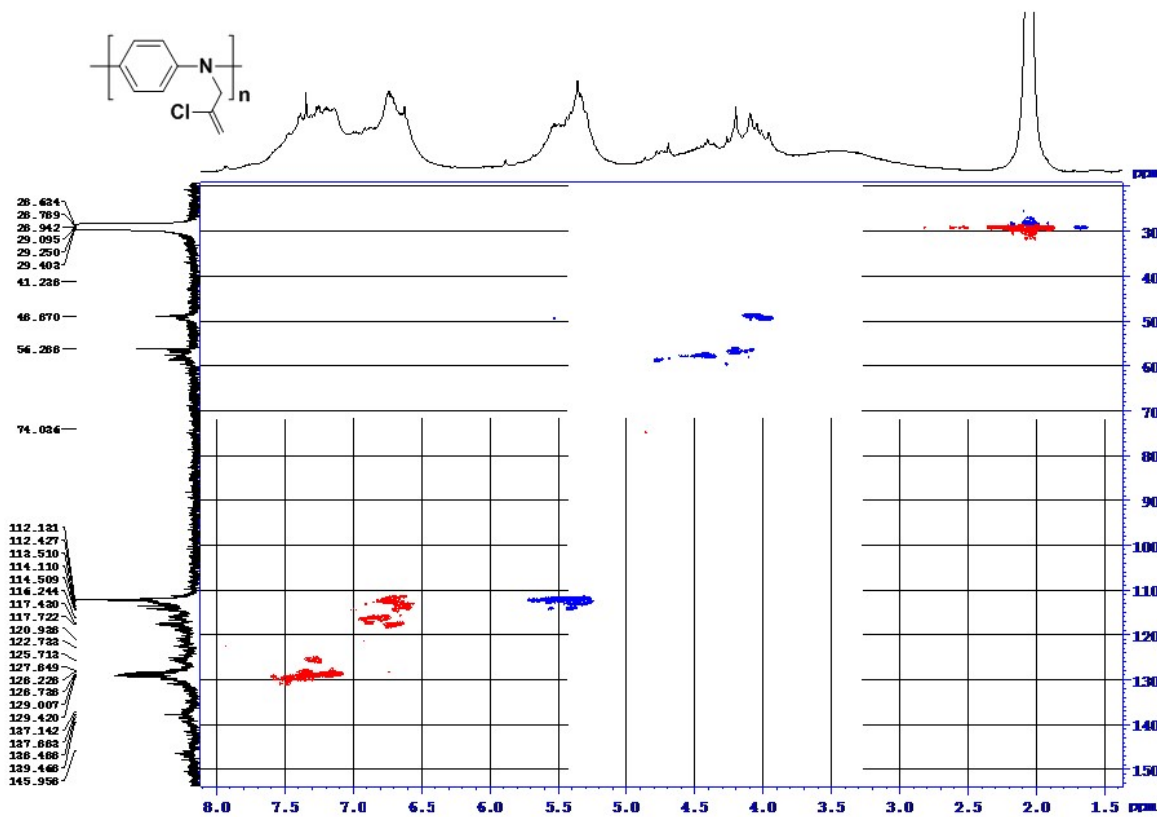

Figure S27. <sup>1</sup>H-<sup>13</sup>C HSQC spectra of poly[N-(2-chloroprop-2-en-1-yl)aniline]

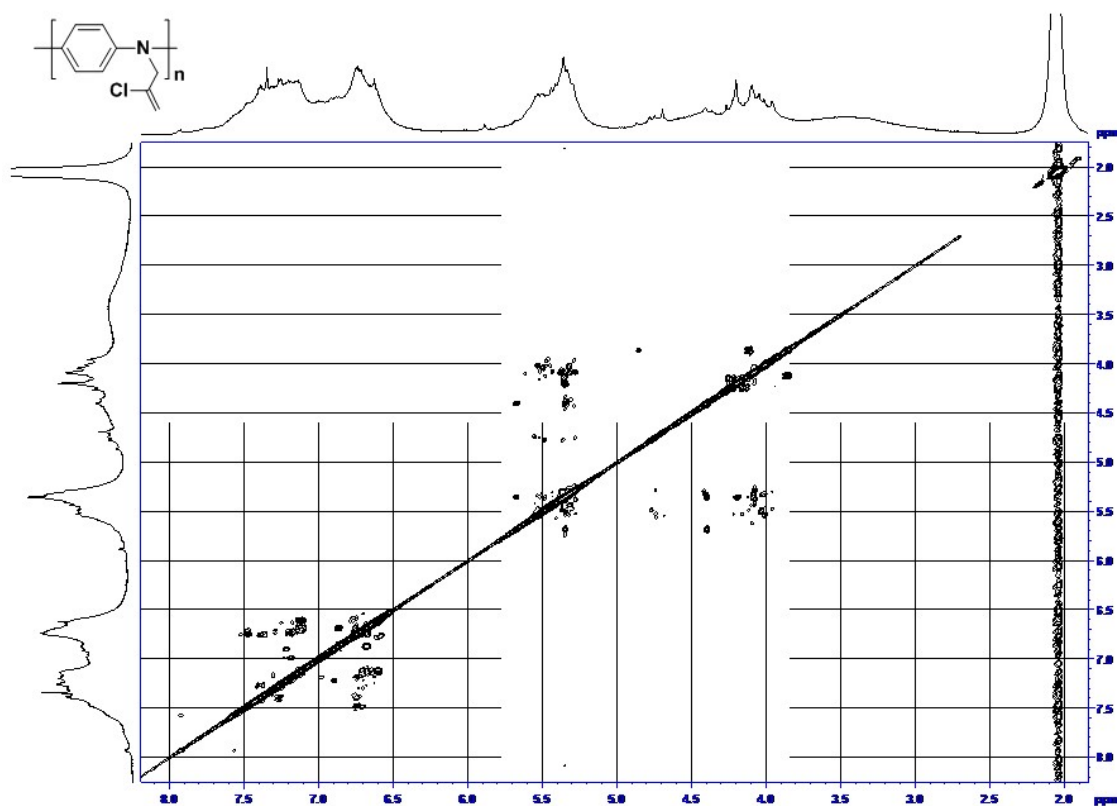

Figure S28. <sup>1</sup>H-<sup>13</sup>C COSY spectra of poly[N-(2-chloroprop-2-en-1-yl)aniline]

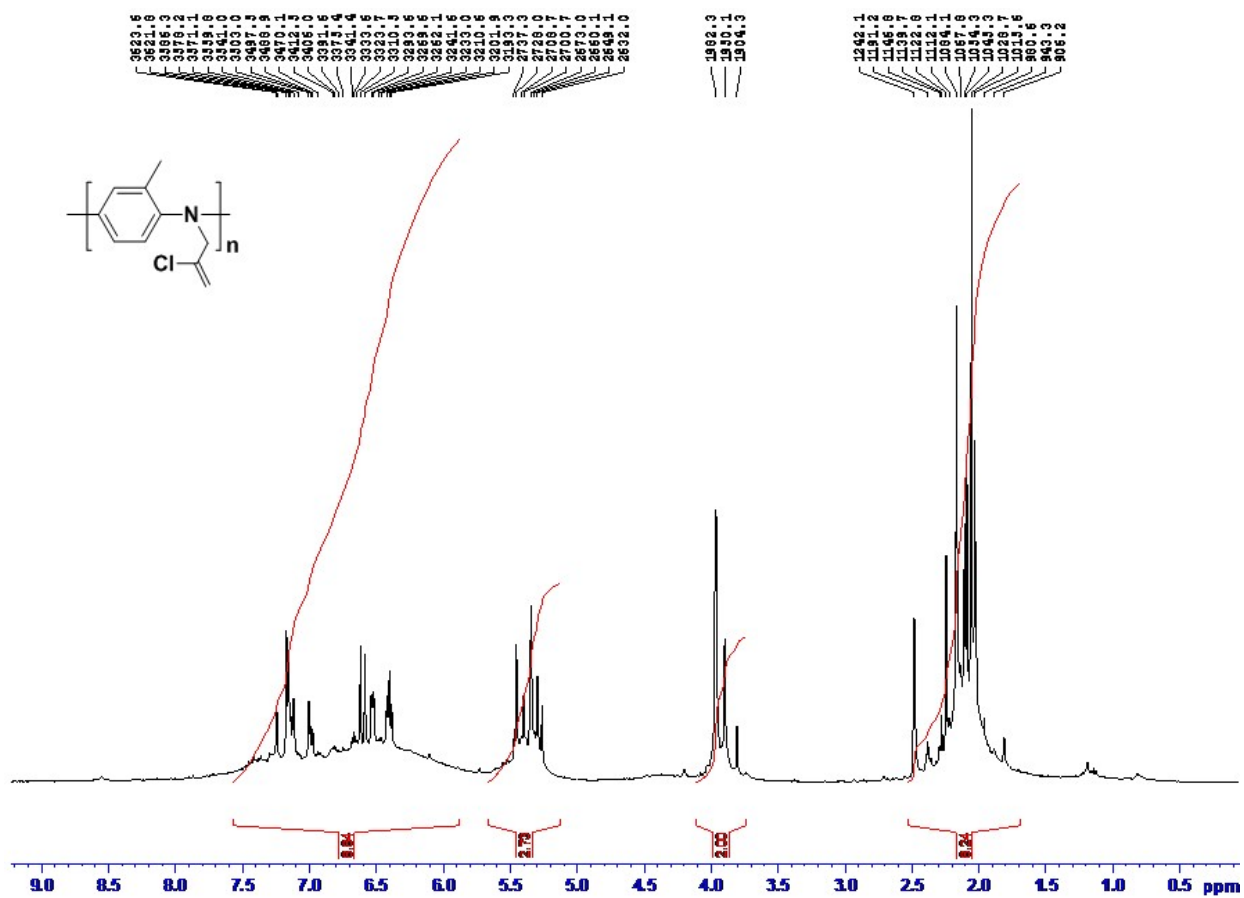

Figure S29. <sup>1</sup>H NMR spectra of poly[N-(2-chloroprop-2-en-1-yl)-2-methylaniline]

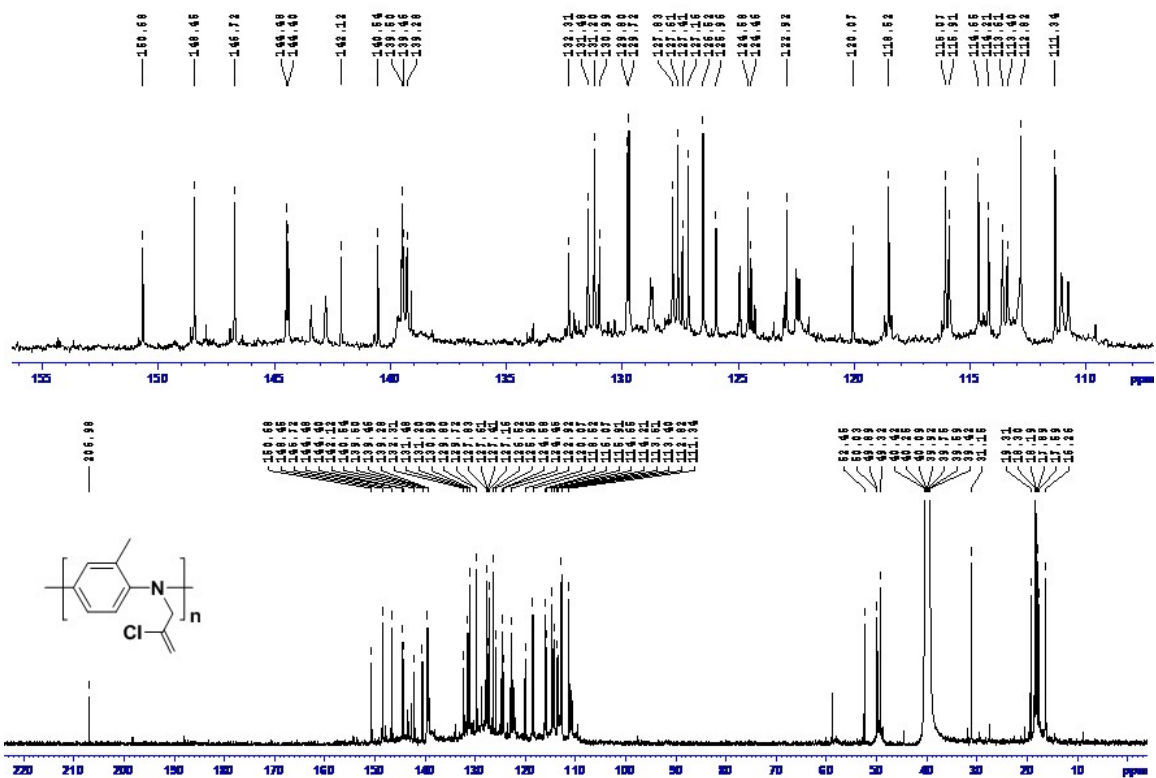

Figure S30. <sup>13</sup>C NMR spectra of poly[N-(2-chloroprop-2-en-1-yl)-2-methylaniline]

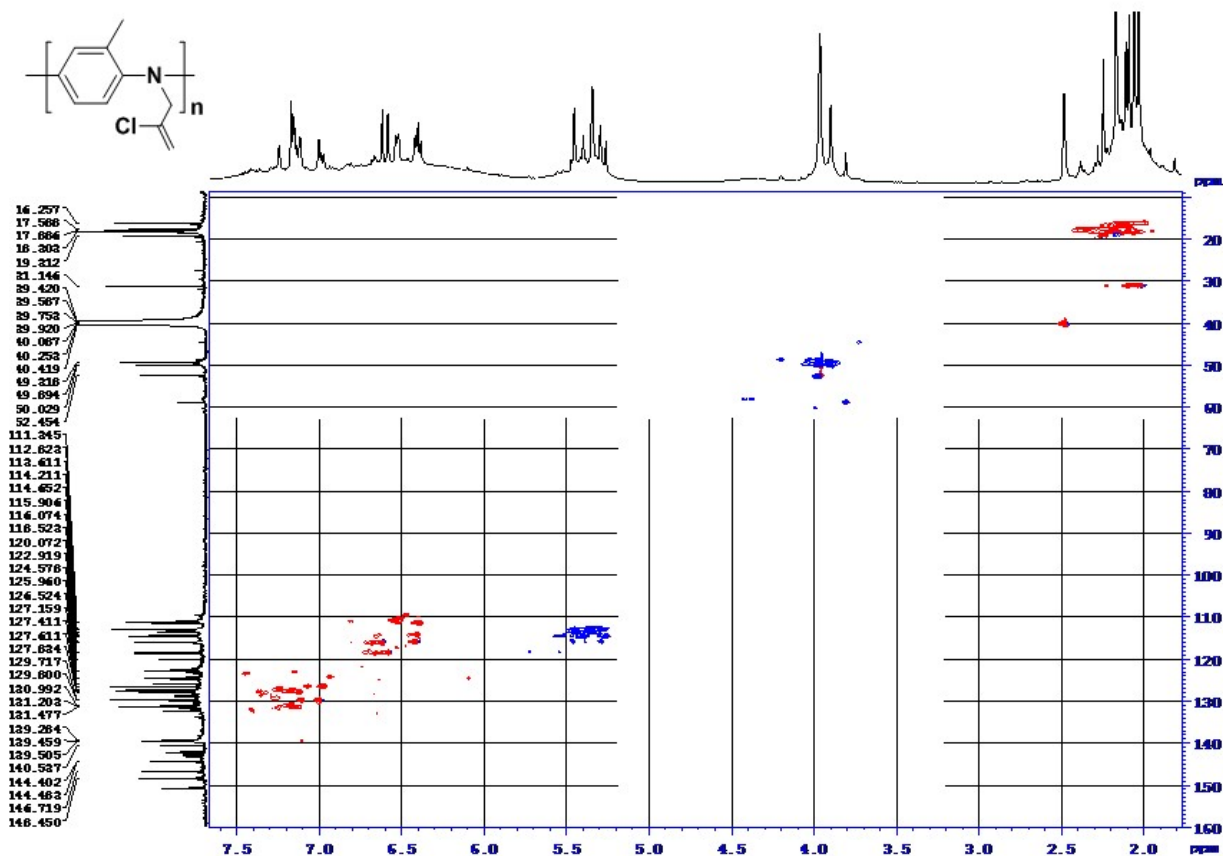

Figure S31.  $^1\text{H}$ - $^{13}\text{C}$  HSQC spectra of poly[N-(2-chloroprop-2-en-1-yl)-2-methylaniline]

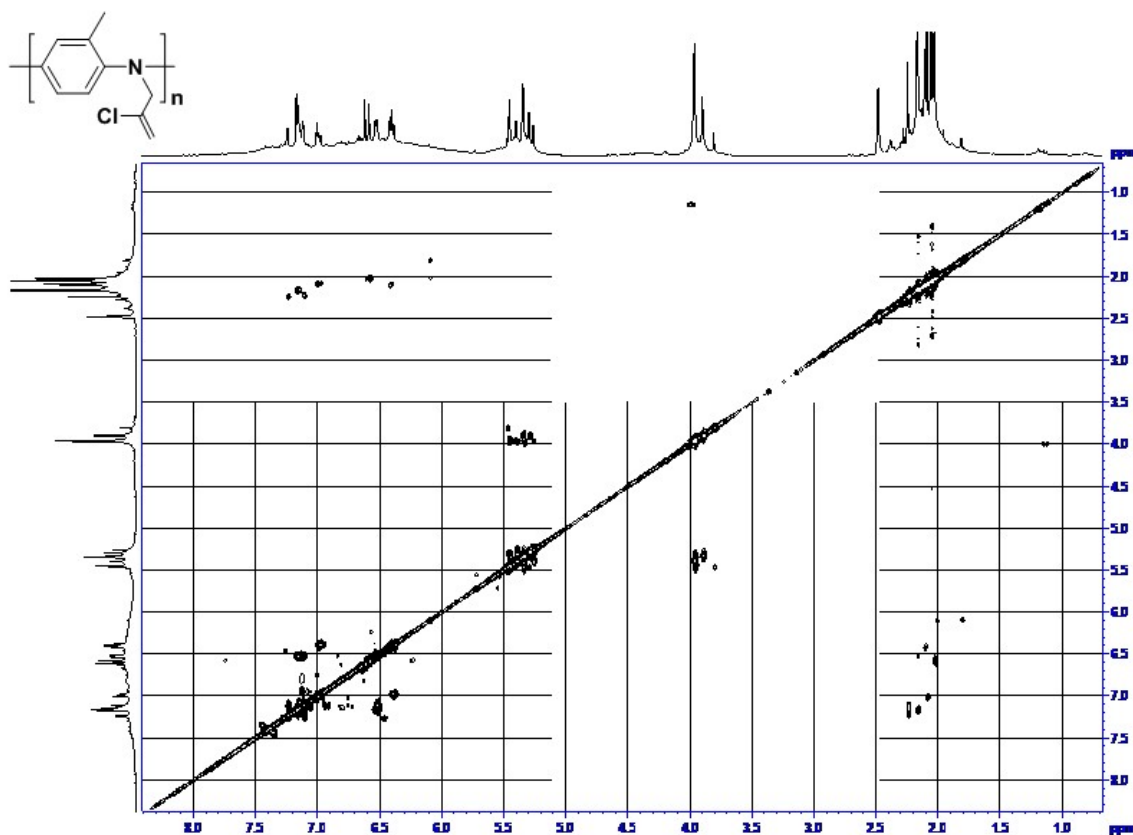

Figure S32.  $^1\text{H}$ - $^{13}\text{C}$  COSY spectra of poly[N-(2-chloroprop-2-en-1-yl)-2-methylaniline]

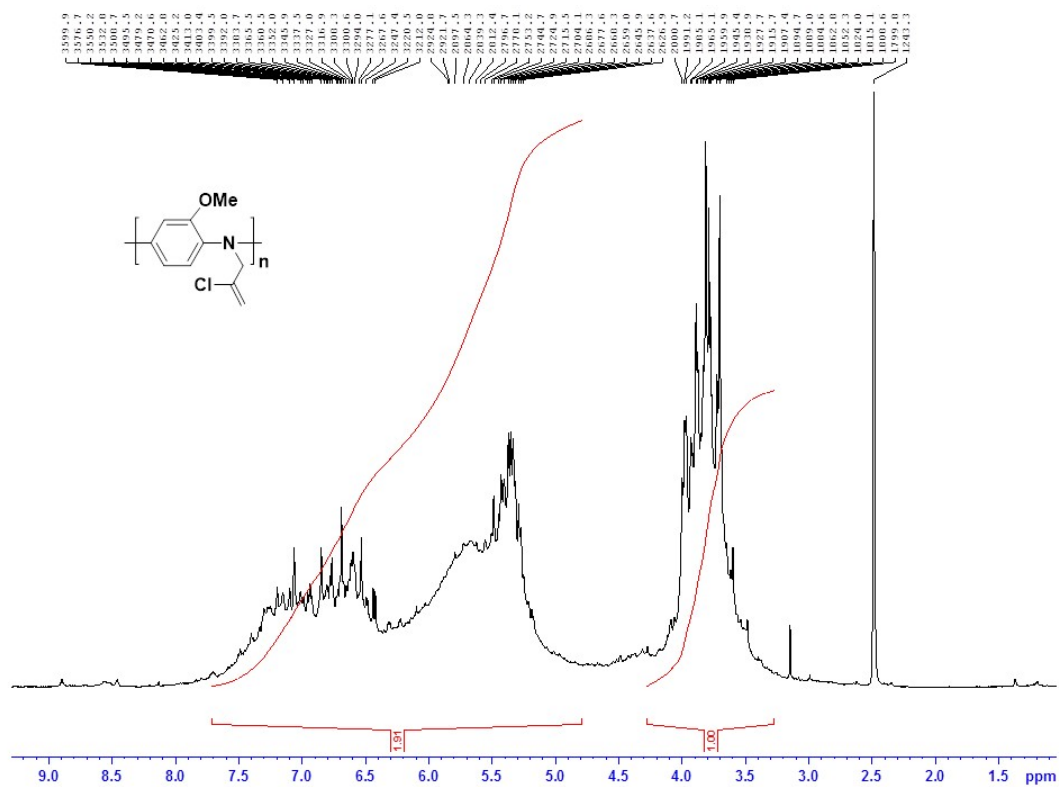

Figure S33. <sup>1</sup>H NMR spectra of poly[N-(2-chloroprop-2-en-1-yl)-2-methoxyaniline]

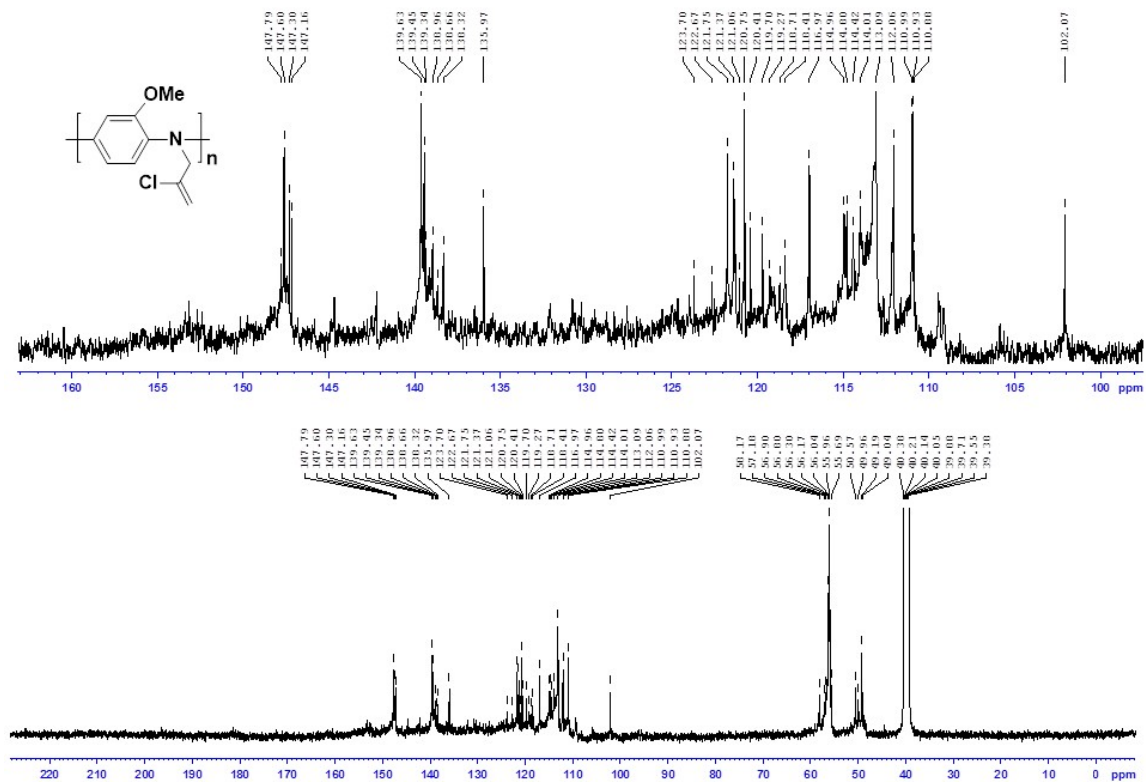

Figure S34. <sup>13</sup>C NMR spectra of poly[N-(2-chloroprop-2-en-1-yl)-2-methoxyaniline]

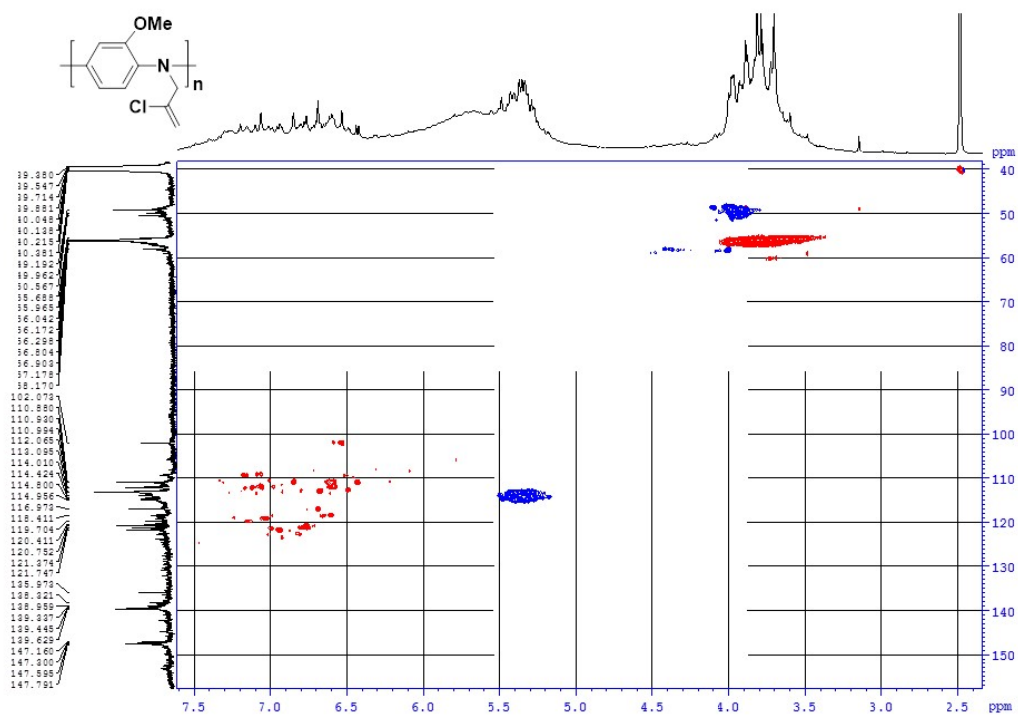

Figure S35.  $^1\text{H}$ - $^{13}\text{C}$  HSQC spectra of poly[N-(2-chloroprop-2-en-1-yl)-2-methoxyaniline]

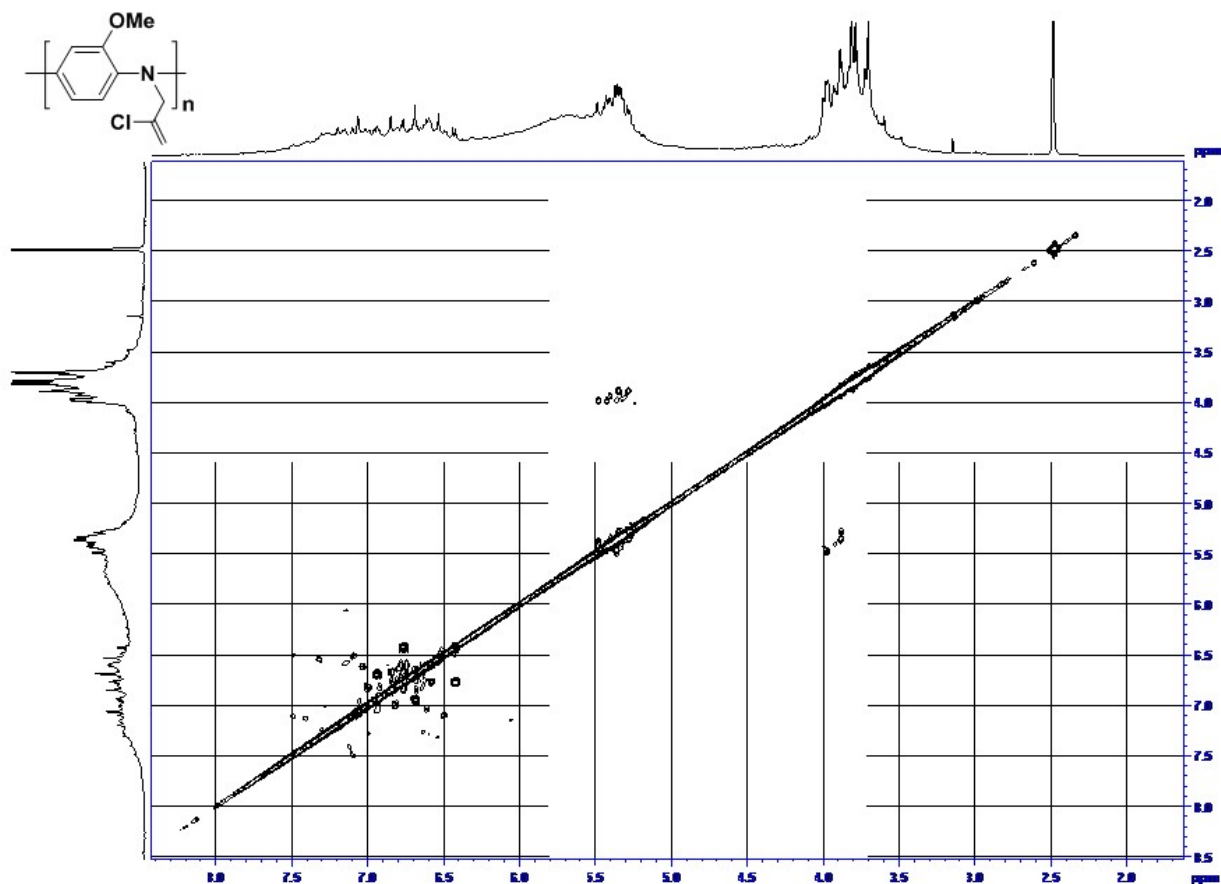

Figure S36.  $^1\text{H}$ - $^{13}\text{C}$  COSY spectra of poly[N-(2-chloroprop-2-en-1-yl)-2-methoxyaniline]

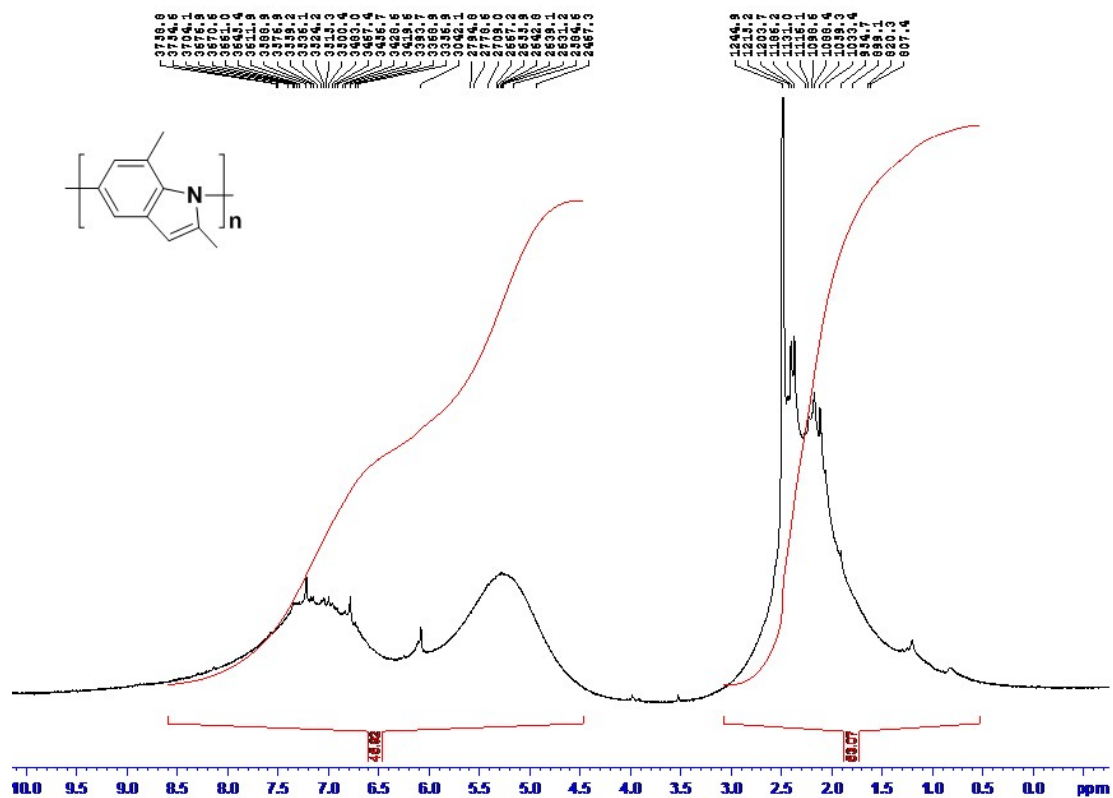

Figure S37. <sup>1</sup>H NMR spectra of poly[2,7-dimethyl-1*H*-indole]

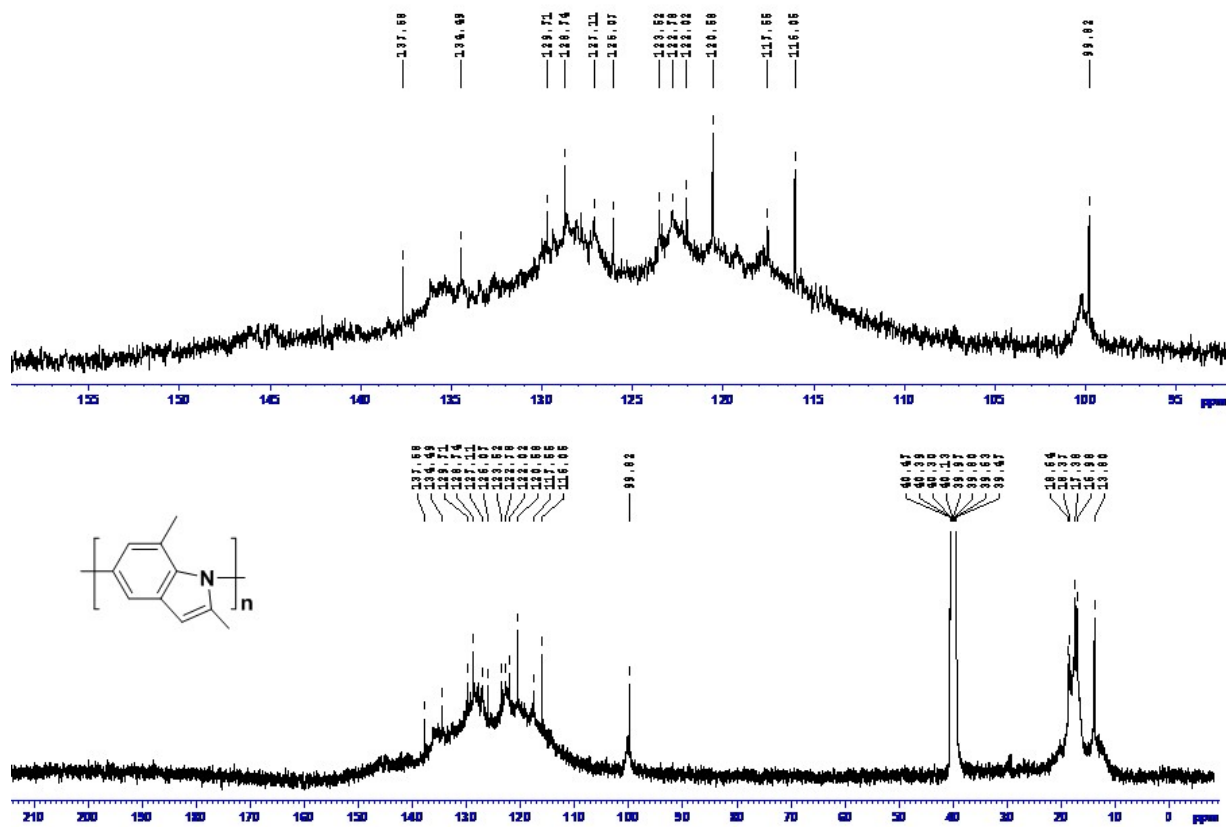

Figure S38. <sup>13</sup>C NMR spectra of poly[2,7-dimethyl-1*H*-indole]

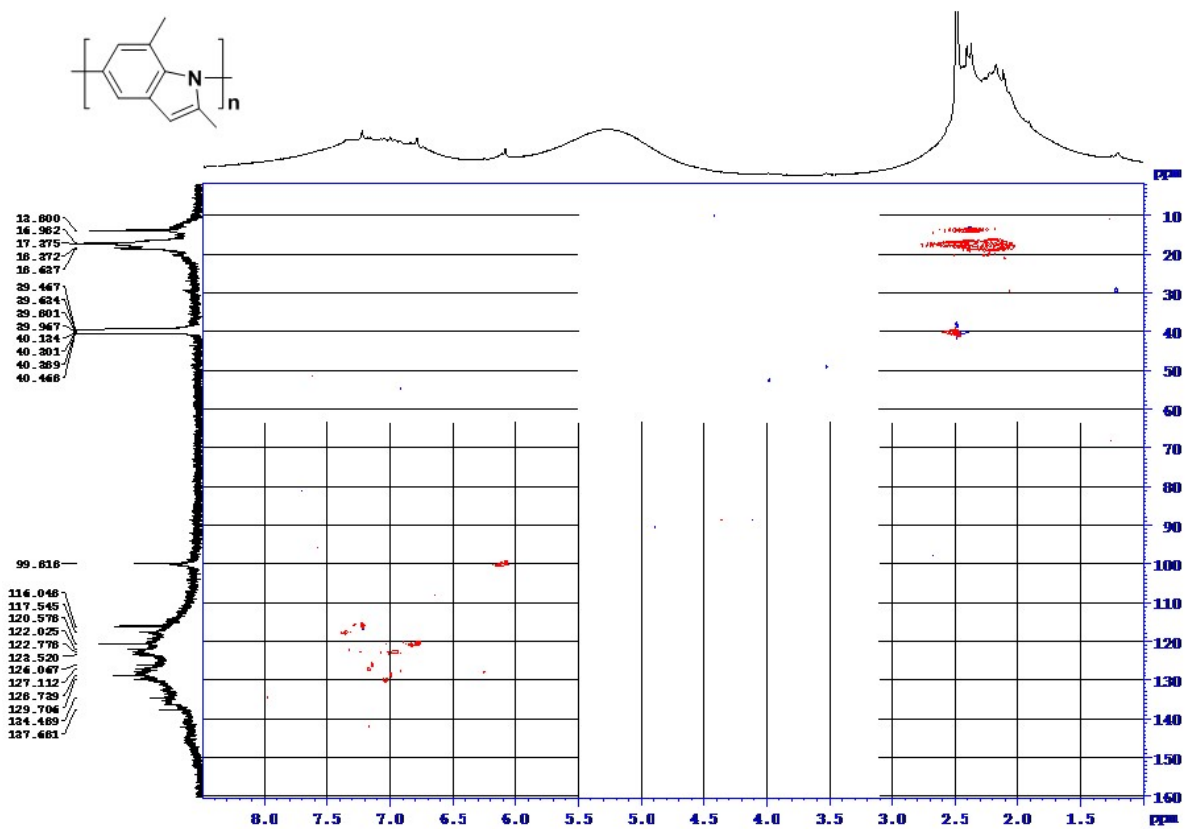

Figure S39.  $^1\text{H}$ - $^{13}\text{C}$  HSQC spectra of poly[2,7-dimethyl-1H-indole]



Chromatogram Plot

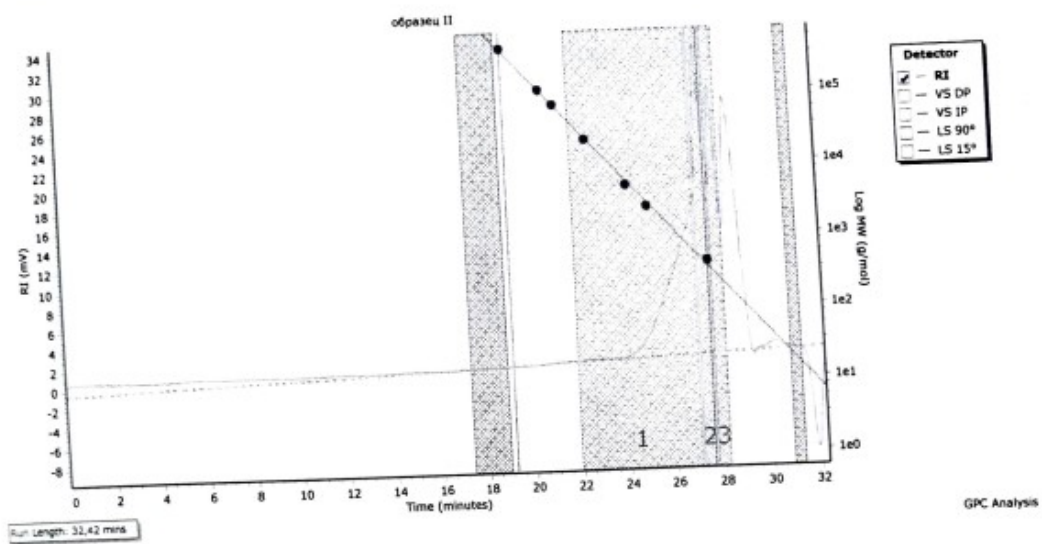

Distribution Plot

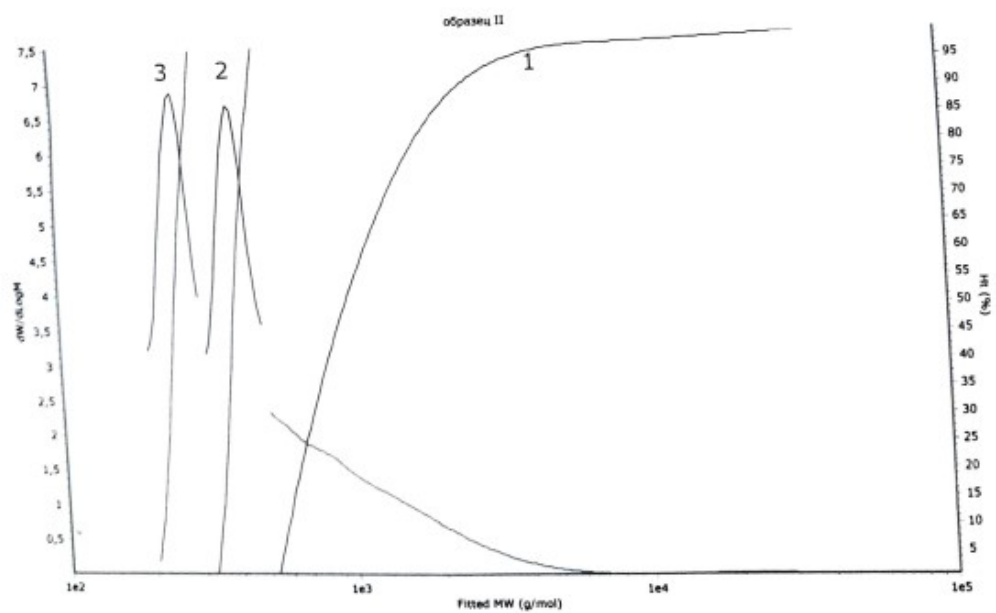

Figure S40. GPC plot of poly[2-methyl-1*H*-indole]

Chromatogram Plot

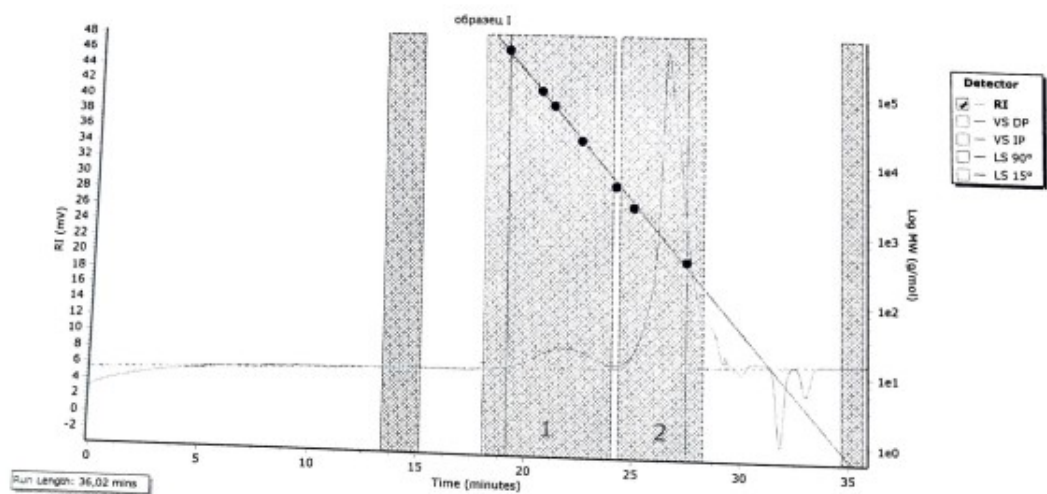

GPC Analysis

Distribution Plot

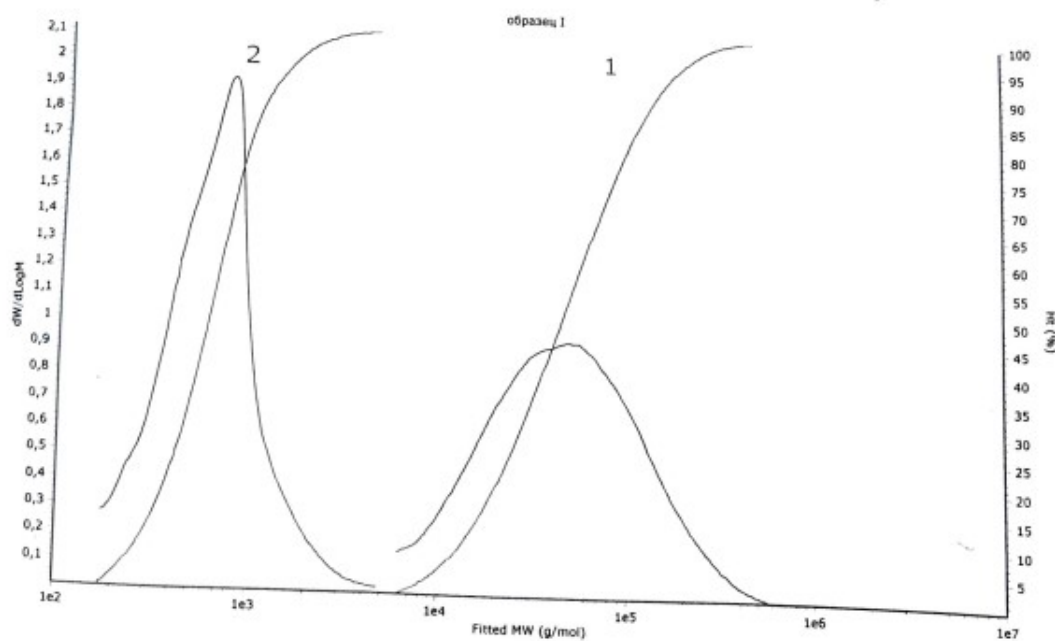

Figure S41. GPC plot of poly[2,7-dimethyl-1*H*-indole]

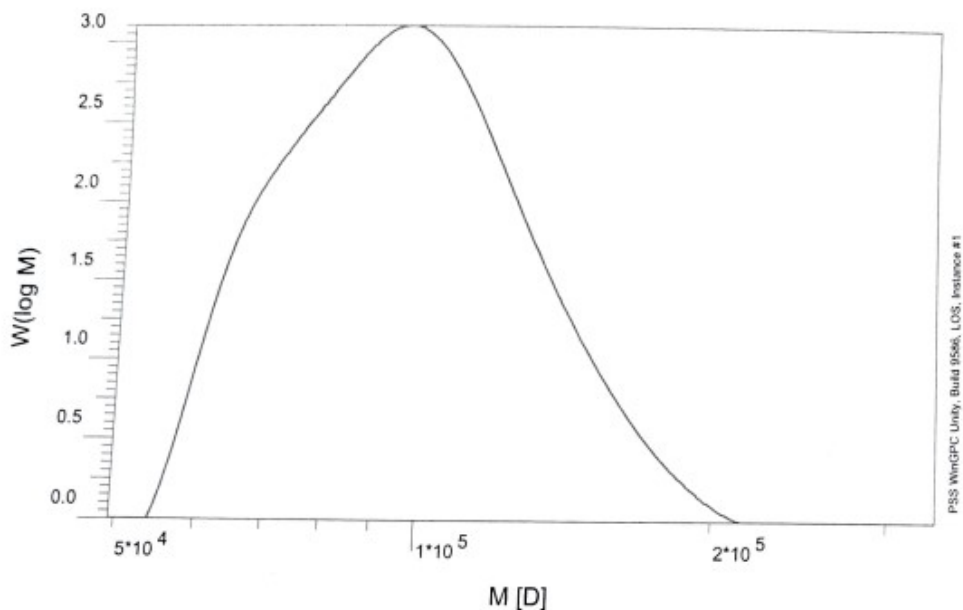

**Sample :** Sample 9 filtrated  
**Integration from:** Sunday 16.02.20 15:07:06  
**Integration to :** Sunday 16.02.20 15:11:42  
**Calibration File :** PS\_THF\_ReadyCal.CAL  
**MHK - A (Cal.):** 6.369E-7  
**Int.stand.-cal.:** 50.000 ml  
**Pump :** LC-20AD  
**Concentration :** 1.000 g/l  
**Column 1 :** PSS SDV 10um e3  
**Column 2 :** PSS SDV 10 um e5  
**Column 3 :** PSS SDV 10um e7  
**Detector 1 :** RID-10A  
**Detector 2 :** WGE n-100x/n-201x  
**Detector 3 :** WGE n-100x/n-201x  
**Operator :** Rafikov Ratmir

**Eluent :** THF  
**MHK - K (Cal.):** 3.233E-2 ml/g  
**Int.stand.-sam.:** ----- ml  
**Flowrate :** 1.000 ml/min  
**Inject volume :** 500.000 ul  
**Temperature :** 35.000 °C  
**Temperature :** 35.000 °C  
**Temperature :** 35.000 °C  
**Delay volume :** 0.880 ml  
**Delay volume :** 0.000 ml  
**Delay volume :** 0.000 ml  
**Acquisition interval** 1.000 sec

| RID-10A            |          |             |
|--------------------|----------|-------------|
|                    |          | Uncert. [%] |
| <b>Mn :</b>        | 9.2566e4 | 1.86 g/mol  |
| <b>Mw :</b>        | 9.9696e4 | 1.79 g/mol  |
| <b>Mz :</b>        | 1.0772e5 | 1.84 g/mol  |
| <b>Mv :</b>        | 9.8319e4 | 1.86 g/mol  |
| <b>D :</b>         | 1.0770e0 | 2.58        |
| <b>[n] :</b>       | 4.8885e1 | 1.13 ml/g   |
| <b>Vp :</b>        | 3.2458e1 | 1.78 ml     |
| <b>Mp :</b>        | 9.6167e4 | 1.89 g/mol  |
| <b>A :</b>         | 1.266e-5 | 1.78 ml*V   |
| <b>&lt; 49380</b>  | 0.00     | 1.78        |
| <b>w% :</b>        | 100.00   | 1.78        |
| <b>&gt; 336220</b> | 0.00     | 1.78        |

**Figure S42.** GPC plot of poly[7-methoxy-2-methyl-1*H*-indole]
